# Supplementary material
Source: PubMed Central journal article supplement (PMC4969182)
Supplement: NIHMS800980-supplement.pdf [file NIHMS800980-supplement.pdf]

**Table of contents**

|                                   | page                                                                                                                                  |    |
|-----------------------------------|---------------------------------------------------------------------------------------------------------------------------------------|----|
| Table S1                          | <i>Enterobacteriaceae</i> tailed phage MCP matches in bacterial genomes                                                               | 2  |
| Table S2                          | P2 supercluster phages and prophages                                                                                                  | 4  |
| Table S3                          | P22-like and P2-like prophages in <i>Salmonella</i> genome sequences                                                                  | 8  |
| Table S4                          | P22-like phages and prophages used this study                                                                                         | 12 |
| Figure S1                         | Phage IME-EC2 map and gene database matches                                                                                           | 17 |
| Figure S2                         | Dot plot analysis of P2-like prophage MCPs from the <i>Enterobacteriaceae</i>                                                         | 20 |
| Figure S3                         | Genome dot plot of authentic P2 supercluster phages                                                                                   | 22 |
| Figure S4                         | Dot plot analysis of MCPs of P2-like phages and prophages from the Proteobacteria                                                     | 24 |
| Figure S5                         | Expanded genome dot plot of P2-like phages and prophages with distantly related hosts                                                 | 26 |
| Figure S6                         | Expanded genome dot plot analysis of authentic P2-like phage examples from different Gammaproteobacteria families                     | 28 |
| Figure S7                         | Genome organizational types of the P22-like phages                                                                                    | 29 |
| Figure S8                         | Dot plot analysis of a sample of diverse <i>Enterobacteriaceae</i> P22-like prophage genomes                                          | 30 |
| Figure S9                         | Dot plot analysis of P22-like phage and prophage MCPs                                                                                 | 32 |
| Figure S10                        | Dot plot analysis of P22-like prophage genomes in <i>Salmonella enterica</i>                                                          | 34 |
| Figure S11                        | Dot plot analysis of genomes of P22-like prophages in <i>Salmonella enterica</i> serovar Typhimurium isolates                         | 35 |
| Figure S12                        | Dot plot analysis of genomes of P22-like prophages in <i>Salmonella enterica</i> serovar Heidelberg isolates                          | 36 |
| Figure S13                        | Dot plot analysis of genomes of P22-like prophages in <i>Salmonella enterica</i> serovar Typhimurium isolates                         | 37 |
| Figure S14                        | Dot plot analysis of genomes of P22-like prophages in <i>Salmonella enterica</i> serovar Newport isolates                             | 38 |
| Figure S15                        | O-antigen synthesis ( <i>rfb</i> gene) regions of the genomes of the <i>Salmonella</i> strains that carry "anomalous" tailspike genes | 39 |
| Figure S16                        | New mosaic boundary in the P22-like tailspike gene                                                                                    | 41 |
| Supplementary Material references |                                                                                                                                       | 43 |

**Table S1**  
**Enterobacteriaceae tailed phage MCP matches in bacterial genomes**

| Cluster         | Prototype phage | Prototype phage host | Bacterial genera / authentic phage with >50% MCP matches outside the <i>Enterobacteriaceae</i> <sup>1</sup> |
|-----------------|-----------------|----------------------|-------------------------------------------------------------------------------------------------------------|
| Lytic 1         | T1              | <i>Escherichia</i>   | None / none                                                                                                 |
| Lytic 2         | T4              | <i>Escherichia</i>   | None / <i>Acinetobacter</i> phage Acj9-75%                                                                  |
| Lytic 3         | Vi01            | <i>Salmonella</i>    | None / <i>Delftia</i> phage øW-14-54%                                                                       |
| Lytic 4         | T5              | <i>Escherichia</i>   | None / <i>Vibrio</i> phage pVp-1-60%                                                                        |
| Supercluster    | T7              |                      |                                                                                                             |
| Lytic 5         | T7              | <i>Escherichia</i>   | None / <i>Stenotrophomonas</i> phage IME15 82%                                                              |
| Lytic 6         | SP6             | <i>Salmonella</i>    | None / none                                                                                                 |
| Lytic 7         | KP34            | <i>Klebsiella</i>    | None / <i>Vibrio</i> phage VP93-74%                                                                         |
| Lytic 8         | LIMEzero        | <i>Pantoea</i>       | None / <i>Ralstonia</i> phage RSB3-51%                                                                      |
| Lytic 9         | øKT             | <i>Escherichia</i>   | None / none                                                                                                 |
| Lytic 10        | GAP227          | <i>Cronobacter</i>   | None / <i>Aeromonas</i> phage øAS7-82%                                                                      |
| Lytic 11        | N4              | <i>Escherichia</i>   | <i>Mezorhizobium</i> -75% / <i>Delftia</i> phage RG-2014-62%                                                |
| Lytic 12        | 9NA             | <i>Salmonella</i>    | None / none                                                                                                 |
| Lytic 13        | Chi             | <i>Salmonella</i>    | None / none                                                                                                 |
| Lytic 14        | øEco32          | <i>Escherichia</i>   | None / none                                                                                                 |
| Lytic 15        | Felix-O1        | <i>Salmonella</i>    | None / none                                                                                                 |
| Supercluster    | SETP3           |                      |                                                                                                             |
| Lytic 16        | SETP3           | <i>Salmonella</i>    | <i>Acinetobacter</i> -64% / none                                                                            |
|                 | K1-dep(1)       | <i>Escherichia</i>   | <i>Sinorhizobium</i> -61% / <i>Synechococcus</i> phage S-CBS4-56%                                           |
| Lytic 17        | SO-1            | <i>Sodalis</i>       | None / none                                                                                                 |
| Lytic 18        | ECO1230-10      | <i>Escherichia</i>   | <i>Marinobacter</i> -60% / <i>Pseudomonas</i> phage PPpW-3-68%                                              |
| Lytic 19        | Gj1             | <i>Escherichia</i>   | <i>Aeromonas</i> -60% / <i>Shewanella</i> phage Spp001-56%                                                  |
| Lytic 20        | PY100           | <i>Yersinia</i>      | None / none                                                                                                 |
| Supercluster    | rV5             |                      |                                                                                                             |
| Lytic 21        | Ø92             | <i>Escherichia</i>   | None / none                                                                                                 |
| Lytic 22        | rV5             | <i>Escherichia</i>   | None / none                                                                                                 |
| Lytic 23        | SPN3US          | <i>Salmonella</i>    | None / none                                                                                                 |
| Lytic 24        | RaK2            | <i>Klebsiella</i>    | None / none                                                                                                 |
| Lytic 25        | øR1-37          | <i>Yersinia</i>      | None / none                                                                                                 |
| Lytic 26        | E1              | <i>Salmonella</i>    | None / <i>Vibrio</i> phage pYD38-A-79%                                                                      |
| Lytic 27        | EMCL-117        | <i>Escherichia</i>   | <i>Burkholderia</i> -52% / <i>Pseudomonas</i> phage DL60-67% <sup>c</sup>                                   |
| Lytic 28        | KF-1            | <i>Edwardsiella</i>  | None / <i>Vibrio</i> phage VPMS1-69%                                                                        |
| Lytic 29        | MSW-3           | <i>Edwardsiella</i>  | None / <i>Iodobacter</i> phage øPLPE-68%                                                                    |
| Lytic 30        | Ea35-70         | <i>Erwinia</i>       | None / none                                                                                                 |
| Lytic 31        | øEaH1           | <i>Erwinia</i>       | None / none                                                                                                 |
| Lytic 32        | 9g              | <i>Escherichia</i>   | None / none                                                                                                 |
| Lytic 33        | IME-EC2         | <i>Escherichia</i>   | None / none                                                                                                 |
| Lytic 34        | Ss1             | <i>Cronobacter</i>   | None / none                                                                                                 |
| Lytic 35        | CVT22           | <i>Citrobacter</i>   | None / i phage CW02-63%                                                                                     |
| Supercluster    | Lambda          |                      |                                                                                                             |
| Temperate 1     | Lambda          | <i>Escherichia</i>   | None / none                                                                                                 |
| Temperate 2 & 3 | ø80 & N15       | <i>Escherichia</i>   | None / none                                                                                                 |
|                 | PY54            | <i>Yersinia</i>      | <i>Vibrio</i> -76% / none                                                                                   |
| Temperate 4     | HK97            | <i>Escherichia</i>   | <i>Pseudomonas</i> 78% / none                                                                               |
|                 | mEp235          | <i>Escherichia</i>   | <i>Pseudomonas</i> -80% / none                                                                              |
| Temperate 5     | ES18            | <i>Salmonella</i>    | <i>Pseudomonas</i> -69% / <i>Pseudomonas</i> phage ø297-69%                                                 |
| Temperate 6     | Gifsy-2         | <i>Salmonella</i>    | <i>Photobacterium</i> -57% / <i>Pseudomonas</i> phage F10-55%                                               |
| Temperate 7     | BP-4795         | <i>Escherichia</i>   | None, none                                                                                                  |
| Temperate 8     | SfV             | <i>Shigella</i>      | <i>Aggregatibacter</i> -64% / none                                                                          |
|                 | SfI             | <i>Shigella</i>      | <i>Vibrio</i> -84% / none                                                                                   |
| Temperate 9     | P22             | <i>Salmonella</i>    | None / none                                                                                                 |
|                 | Sf6             | <i>Shigella</i>      | None / none                                                                                                 |
| Temperate 10    | APSE-1          | <i>Hamiltonella</i>  | None / none                                                                                                 |
| Temperate 11    | 933W            | <i>Escherichia</i>   | <i>Photobacterium</i> -63%, none                                                                            |

Table S1 cont.

| Cluster      | Prototype phage | Prototype phage host  | Bacterial genera / phage with >50% MCP matches <sup>1</sup> outside <i>Enterobacteriaceae</i> |
|--------------|-----------------|-----------------------|-----------------------------------------------------------------------------------------------|
| Temperate 12 | HK639           | <i>Escherichia</i>    | <i>Castellaniella</i> -55% / none                                                             |
| Temperate 13 | øES15           | <i>Cronobacter</i>    | None / none                                                                                   |
| Temperate 14 | HS2*            | <i>Sodalis</i>        | <i>Acinetobacter</i> -77% / none                                                              |
| Temperate 15 | ENT47670        | <i>Cronobacter</i>    | <i>Vibrio</i> -77% / none                                                                     |
| Temperate 16 | ZF40            | <i>Pectobacterium</i> | None / none                                                                                   |
| Temperate 17 | øEt88           | <i>Erwinia</i>        | None / <i>Xanthomonas</i> phage DIBBI-53%                                                     |
| Temperate 18 | ε15             | <i>Salmonella</i>     | <i>Pseudomonas</i> -65% / none                                                                |
| Temperate 19 | P1              | <i>Escherichia</i>    | None / none                                                                                   |
| Supercluster | P2              |                       |                                                                                               |
| Temperate 20 | P2              | <i>Escherichia</i>    | <i>Burkholderia</i> -55% / <i>Burkholderia</i> phage-55%                                      |
| Temperate 21 | ESSI-2          | <i>Cronobacter</i>    | <i>Vibrio</i> -59% / <i>Vibrio</i> phage-53%                                                  |
| Temperate 22 | Mu              | <i>Escherichia</i>    | <i>Marinomonas</i> -62% / <i>Pseudomonas</i> phage DMS3-51%                                   |
| Temperate 23 | SSU5            | <i>Salmonella</i>     | <i>Acinetobacter</i> -60% / none                                                              |
| Temperate 24 | PEp14           | <i>Erwinia</i>        | <i>Rhizobium</i> -66% / <i>Sinorhizobium</i> phage PBC5 phage-66%                             |
| Temperate 25 | GF-2            | <i>Edwardsiella</i>   | None / none                                                                                   |
| Temperate 26 | SEN34           | <i>Salmonella</i>     | <i>Pseudomonas</i> -59% / none                                                                |

- Percent MCP identity as reported by BLASTp
  - Red text highlights prophages in other bacterial families with MCPs >75% identical to MCPs of a temperate *Enterobacteriaceae* phage cluster.
  - Blue text highlights prophages in other bacterial families with MCPs between 50% and 70% identical to MCPs of a lytic *Enterobacteriaceae* phage cluster.
- Several phages in the EMCL-117-like phage group, for example phage øVader, have recently been reported to grow lytically on both *E. coli* and *Pseudomonas aeruginosa* (Malki *et al.*, 2015).

Table S2  
P2 Supercluster Phages and Prophages**A** *Enterobacteriaceae* P2-like phages in this study

| Cluster      | Phage                 | Host species                 | Accession number | Genome orientation | Genome sequence publication |
|--------------|-----------------------|------------------------------|------------------|--------------------|-----------------------------|
| Temperate 20 | P2                    | <i>Escherichia coli</i>      | AF063097         | P2                 | numerous publications       |
|              | W $\phi$              | <i>Escherichia coli</i>      | AY135739         | P2                 | –                           |
|              | L-413C                | <i>Yersinia pestis</i>       | AY251033         | P2                 | Virology 372:85             |
|              | $\phi$ AA91-ss        | <i>Escherichia coli</i>      | KF322032         | P2                 | JVirol 87:13665             |
|              | pro147                | <i>Escherichia coli</i>      | KR073660         | P2                 | –                           |
|              | pro483                | <i>Escherichia coli</i>      | KR073661         | P2                 | –                           |
|              | 186                   | <i>Escherichia coli</i>      | U32222           | P2                 | numerous publications       |
|              | PsP3                  | <i>Salmonella enterica</i>   | NC_005340        | P2                 | –                           |
|              | FSL-SP-004            | <i>Salmonella enterica</i>   | KC139521         | P2                 | BMCgenomics 14:481          |
|              | ENT90                 | <i>Erwinia amylovora</i>     | HQ110084         | P2                 | –                           |
|              | SopE $\phi$           | <i>Salmonella enterica</i>   | AY319521         | P2                 | JBact 185:5182              |
|              | Fels-2                | <i>Salmonella enterica</i>   | NC_010463        | P2                 | Nature 413:852              |
|              | RE-2010 (EL $\phi$ S) | <i>Salmonella enterica</i>   | HM770079         | P2                 | ApplEnvironMicro 78:1785    |
|              | SEN1                  | <i>Salmonella enterica</i>   | KT630644         | P2                 | –                           |
|              | SEN4                  | <i>Salmonella enterica</i>   | KT630645         | P2                 | –                           |
|              | SEN5                  | <i>Salmonella enterica</i>   | KT630646         | P2                 | –                           |
|              | SEN8                  | <i>Salmonella enterica</i>   | KT630647         | P2                 | –                           |
|              | P88                   | <i>Escherichia coli</i>      | NC_026014        | P2                 | –                           |
| Temperate 21 | ESSI-2                | <i>Cronobacter sakazakii</i> | HQ110083         | HP1                | Arc hVirol 156:721          |

Table S2  
P2 Supercluster Phages and Prophages

## B P2-like Enterobacteriaceae prophage panel used in this study

| Prophage       | Host species and strain                           | MCP locus_tag    |
|----------------|---------------------------------------------------|------------------|
| AgonaP2-A      | <i>Salmonella enterica</i> (Agona73.H.09)         | SA73_2208        |
| CedP2-1        | <i>Cedecea davisae</i> DSM 4568                   | HMPREF0201_03602 |
| CronoP2-B      | <i>Cronobacter sakazakii</i> SP291                | CSSP291_11880    |
| DickP2-B       | <i>Dickeya zeae</i> EC1                           | W909_12715       |
| Eco541P2-A     | <i>Escherichia coli</i> 541-15                    | EC54115_23648    |
| EcoC3P2-A*     | <i>Escherichia coli</i> 2-011-08_S4_C3            | AD24_4183        |
| EcoP2-CVM-A    | <i>Escherichia coli</i> CVM N36225PS              | PL46_04800       |
| EcoP2-E22-A    | <i>Escherichia coli</i> E22                       | E6E22_1442       |
| EcoP2-KTE10-A  | <i>Escherichia coli</i> KTE10                     | WCM_01332        |
| EcoP2-KTE234-A | <i>Escherichia coli</i> KTE234                    | A193_03379       |
| EdwardP2-A     | <i>Edwardsiella tarda</i> ATCC 15947              | ET1_14_00560     |
| EdwardP2-B     | <i>Edwardsiella piscicida</i> C07-87              | ETAC_02100       |
| EntP2-A        | <i>Enterobacter cloacae</i> ATCC 13047            | ECL_02851        |
| ErwinP2-A      | <i>Erwinia billingiae</i> Eb661                   | Ebc_01060        |
| HafP2-A        | <i>Hafnia alvei</i> FB1                           | AT03_17965       |
| KlebP2-A       | <i>Klebsiella pneumoniae</i> UHKPC57              | H237_1271        |
| MorgP2-A       | <i>Morganella morganii</i> KT                     | MU9_2040         |
| PantP2-A       | <i>Pantoea rwandensis</i> ND04                    | LH22_RS05065     |
| PectP2-C       | <i>Pectobacterium carotovorum</i> PC1             | PC1_2643         |
| ProdP2-A       | <i>Pantoea rodasi</i> ND03                        | QU24_21505       |
| ProvP2-B       | <i>Providencia rustigianii</i> DSM 4541           | PROVRUST_04967   |
| RahnP2-B       | <i>Rahnella aquatilis</i> HX2                     | Q7S_07135        |
| RauoIP2-A      | <i>Raoultella ornithinolytica</i> TNT             | DF41_23110       |
| SalP2-C        | <i>Salmonella enterica</i> Typhimurim YUHS 05-78  | SE14_01921       |
| SerrP2-C       | <i>Serratia odorifer</i> DSM 4582                 | HMPREF0768_1209  |
| ThompP2-A      | <i>Salmonella enterica</i> (Thompson CFSAN000736) | SEETH391_21320   |
| XenoP2-A       | <i>Xenorhabdus doucetiae</i> FRM16                | XDD1_2854        |
| YersP2-A       | <i>Yersinia pseudotuberculosis</i> YP111          | YPK_0899         |
| YersP2-B       | <i>Yersinia enterocolitica</i> Y11                | Y11_25391        |
| YokP2-A        | <i>Yokenella regensburgeri</i> ATCC 43003         | HMPREF0880_02763 |

Table S2  
P2 Supercluster Phages and Prophages

**C** P2-like phages outside the *Enterobacteriaceae*

| Phage            | Host species                        | Host Family      | Class                | MCP locus_tag | Genome sequence publication |
|------------------|-------------------------------------|------------------|----------------------|---------------|-----------------------------|
| BEK              | <i>Burkholderia pseudomallei</i>    | Burkholderiaceae | Beta-Proteobacteria  | CP008753      | –                           |
| KL3              | <i>Burkholderia cepacia</i>         | Burkholderiaceae | Beta-Proteobacteria  | GU911304      | BMCGenomics 11:599          |
| KS14             | <i>Burkholderia cenocepacia</i>     | Burkholderiaceae | Beta-Proteobacteria  | NC_015273     | BMCGenomics 11:599          |
| KS5              | <i>Burkholderia cenocepacia</i>     | Burkholderiaceae | Beta-Proteobacteria  | NC_015265     | BMCGenomics 11:599          |
| ø52237           | <i>Burkholderia pseudomallei</i>    | Burkholderiaceae | Beta-Proteobacteria  | NC_007145     | –                           |
| øE12-2           | <i>Burkholderia pseudomallei</i>    | Burkholderiaceae | Beta-Proteobacteria  | NC_009236     | –                           |
| øE202            | <i>Burkholderia thailandensis</i>   | Burkholderiaceae | Beta-Proteobacteria  | CP000623      | –                           |
| øRSA1            | <i>Ralstonia solanacearum</i>       | Ralstoniaceae    | Beta-Proteobacteria  | AB276040      | JBact 190:143               |
| øX216            | <i>Burkholderia pseudomallei</i>    | Burkholderiaceae | Beta-Proteobacteria  | JX681814      | BMC Microbiol 12:289        |
| RSY1             | <i>Ralstonia solanacearum</i>       | Ralstoniaceae    | Beta-Proteobacteria  | AB981169      | –                           |
| ST79             | <i>Burkholderia pseudomallei</i>    | Burkholderiaceae | Beta-Proteobacteria  | NC_021343     | –                           |
| 535AP1           | <i>Mannheimia haemolytica</i>       | Pasteurellae     | Gamma-Proteobacteria | KP137432      | BMCGenomics15:175           |
| 587AP1           | <i>Mannheimia haemolytica</i>       | Pasteurellae     | Gamma-Proteobacteria | KP137434      | BMCGenomics15:175           |
| 1127AP1          | <i>Mannheimia haemolytica</i>       | Pasteurellae     | Gamma-Proteobacteria | KP137436      | BMCGenomics15:175           |
| 1152AP1          | <i>Mannheimia haemolytica</i>       | Pasteurellae     | Gamma-Proteobacteria | NC_021778     | BMCGenomics15:175           |
| 2256AP1          | <i>Mannheimia haemolytica</i>       | Pasteurellae     | Gamma-Proteobacteria | KP137438      | BMCGenomics15:175           |
| BAA410           | <i>Mannheimia haemolytica</i>       | Pasteurellae     | Gamma-Proteobacteria | DQ426905      | Virology 350:79             |
| F108             | <i>Pasteurella multocida</i>        | Pasteurellae     | Gamma-Proteobacteria | DQ114220      | AEM 72:3154                 |
| HP1              | <i>Haemophilus influenzae</i>       | Pasteurellae     | Gamma-Proteobacteria | NC_001697     | NucleicAcidRes 24:685       |
| HP2              | <i>Haemophilus influenzae</i>       | Pasteurellae     | Gamma-Proteobacteria | AY027935      | JBact 184:6893              |
| K139             | <i>Vibrio cholerae</i>              | Vibrionaceae     | Gamma-Proteobacteria | NC_003313     | JBact 184:6592              |
| Kappa            | <i>Vibrio cholerae</i>              | Vibrionaceae     | Gamma-Proteobacteria | NC_010275     | –                           |
| øCTX             | <i>Vibrio cholerae</i>              | Vibrionaceae     | Gamma-Proteobacteria | AB008550      | MolMicro 31:399             |
| ø3               | <i>Pseudomonas aeruginosa</i>       | Pseudomonadaceae | Gamma-Proteobacteria | KT887559      | –                           |
| øMHaA1-PHL101    | <i>Pseudomonas aeruginosa</i>       | Pseudomonadaceae | Gamma-Proteobacteria | NC_008201     | Virology 350:79             |
| øO18P            | <i>Mannheimia haemolytica</i>       | Pasteurellae     | Gamma-Proteobacteria | NC_009542     | Virology 373:25             |
| øAeromonas media | <i>Aeromonas media</i>              | Aeromonadaceae   | Gamma-Proteobacteria | NC_009542     | –                           |
| PV94             | <i>Vibrio vulnificus</i>            | Vibrionaceae     | Gamma-Proteobacteria | HG803181      | PLoS One 9:e94707           |
| Smp131           | <i>Stenotrophomonas maltophilia</i> | Xanthomonaceae   | Gamma-Proteobacteria | JO809663      | BMC Microbiol 14:17         |
| VPUSM 8          | <i>Vibrio cholerae</i>              | Vibrionaceae     | Gamma-Proteobacteria | NC_022747     | –                           |

Table S2  
P2 Supercluster Phages and Prophages

**D** P2-like prophages outside the *Enterobacteriaceae*

| Prophage         | Host species and strain                       | Host Family                             | Class                | MCP locus_tag    |
|------------------|-----------------------------------------------|-----------------------------------------|----------------------|------------------|
| BrevuP2-A        | <i>Brevundimonas diminuta</i> ATCC-11568      | Caudobacteriaceae                       | Alpha-Proteobacteria | BDIM_14580       |
| NovoP2-A         | <i>Novosphingobium pentarothovans</i> US6-1   | Sphingomonadaceae                       | Alpha-Proteobacteria | J159_04365       |
| ZymoP2-A         | <i>Zymomonas mobilis</i> ZM4                  | Sphingomonadaceae                       | Alpha-Proteobacteria | ZZM4_0034        |
| AchromoP2-A      | <i>Achromobacter</i> sp. LC458                | Alcaligenaceae                          | Beta-Proteobacteria  | YH64_11480       |
| BurkP2-A         | <i>Burkholderia thailandensis</i> MSMB121     | Burkholderiaceae                        | Beta-Proteobacteria  | BTL_1970         |
| BurkP2-B         | <i>Burkholderia cenocepacia</i> MCO-3         | Burkholderiaceae                        | Beta-Proteobacteria  | Bcenm03_0205     |
| Collip2-A        | <i>Collimonas fungivorans</i> Ter331          | Collimonadaceae                         | Beta-Proteobacteria  | CFU_0996         |
| ComaP2-A         | <i>Comamonas testosteroni</i> TK102           | Comamonadaceae                          | Beta-Proteobacteria  | O987_RS22905     |
| CupP2-A          | <i>Cupriavidus taiwanensis</i> LMG19424       | Cupriavidaceae                          | Beta-Proteobacteria  | RALTA_A0929      |
| KingP2-A         | <i>Kingella oralis</i> ATCC 51147             | Burkholderiaceae                        | Beta-Proteobacteria  | GCWU000324_01254 |
| NeissP2-A        | <i>Neisseria meningitidis</i> alpha710        | Neisseriaceae                           | Beta-Proteobacteria  | NMMB_1121        |
| PolarP2-A        | <i>Polaromonas naphthalenivorans</i> CJ2      | Comamonadaceae                          | Beta-Proteobacteria  | Prap_3291        |
| DesulfP2-A       | <i>Desulfivibrio desulfuricans</i> ATCC 27774 | Desulfivibrionaceae                     | Delta-Proteobacteria | Ddes_0241        |
| DesulfP2-B       | <i>Desulfivibrio vulgaris</i> DP4             | Desulfivibrionaceae                     | Delta-Proteobacteria | Dvul_2765        |
| AcinP2-A         | <i>Acinetobacter baumannii</i> AYE            | Pseudomonadales; Moraxellaceae          | Gamma-Proteobacteria | ABAYE0571        |
| AcinP2-B         | <i>Acinetobacter ursingii</i> NIPH 706        | Pseudomonadales; Moraxellaceae          | Gamma-Proteobacteria | F943_01500       |
| AeroP2-A         | <i>Aeromonas hydrophila</i> AL06-06           | Aeromonadae                             | Gamma-Proteobacteria | RY45_19020       |
| AeroP2-B         | <i>Aeromonas salmonicida</i> 2009-144K3       | Aeromonadae                             | Gamma-Proteobacteria | NX85_17375       |
| AzoP2-A          | <i>Azotobacter vinelandii</i> CA              | Pseudomonadales; Pseudomonadaceae       | Gamma-Proteobacteria | AvCA_37590       |
| CardP2-A         | <i>Cardiobacterium hominis</i> ATCC-15926     | Cardiobacteriaceae                      | Gamma-Proteobacteria | HMPREF0198_2128  |
| ChromoP2-A       | <i>Chromohalobacter salexigens</i> DSM 3043   | Halomonadaceae                          | Gamma-Proteobacteria | Csal_1397        |
| EndoP2-A         | <i>Endozoicomonas montiporae</i> LMG 24815    | Halellaceae                             | Gamma-Proteobacteria | GZ77_07230       |
| Gallip2-A        | <i>Gallibacterium anatis</i> UMN179           | Pasteurellae                            | Gamma-Proteobacteria | UMN179_00236     |
| HaliP2-A         | <i>Halella chejuensis</i> KCCTC 2396          | Halellaceae                             | Gamma-Proteobacteria | HCH_00394        |
| HaliP2-B         | <i>Halomonas</i> sp. PEN3                     | Halomonadaceae                          | Gamma-Proteobacteria | Q671_08135       |
| MannP2-A         | <i>Mannheimia haemolytica</i> PKL10           | Pasteurellae                            | Gamma-Proteobacteria | AK33_08830       |
| MarmoP2-A        | <i>Mairimonas</i> sp. MMYL1                   | Oceanospirillaceae                      | Gamma-Proteobacteria | Mmwy11_0585      |
| MarinP2-A        | <i>Marinobacter nanhaiticus</i> D15-8W        | Alteromonadales; Alteromonadaceae       | Gamma-Proteobacteria | J057_04576       |
| MortP2-A         | <i>Mortella viscosa</i> MM/S1                 | Alteromonadales; Alteromonadaceae       | Gamma-Proteobacteria | MVIS_2005        |
| Oleip2-A         | <i>Oleispira antarctica</i> RB-8              | Oceanospirillaceae                      | Gamma-Proteobacteria | OLEAN_C08680     |
| PasP2-A          | <i>Pasteurella multocida</i> P1062            | Pasteurellae                            | Gamma-Proteobacteria | P1062_021455     |
| PseudoalteroP2-A | <i>Pseudoalteromonas arctica</i> A 37-1-2     | Pseudoalteromonadaceae; Alteromonadales | Gamma-Proteobacteria | PARC_05148       |
| PseudoalteroP2-B | <i>Pseudoalteromonas atlantica</i> A 37-1-2   | Pseudoalteromonadaceae; Alteromonadales | Gamma-Proteobacteria | Patl_0697        |
| PseudoP2         | <i>Pseudomonas aeruginosa</i> BL13            | Pseudomonadales; Pseudomonadaceae       | Gamma-Proteobacteria | Q067_06185       |
| SheP2-B          | <i>Shewanella baltica</i> OS195               | Shewanellaceae; Alteromonadales         | Gamma-Proteobacteria | Sbal195_2914     |
| StentioP2-A      | <i>Stenotrophomonas maltophilia</i> D457      | Xanthomonadaceae                        | Gamma-Proteobacteria | SMD_3273         |
| Vibriop2-B       | <i>Vibrio cholerae</i> AM-19226               | Vibrionaceae                            | Gamma-Proteobacteria | A33_2125         |
| Vibriop2-A       | <i>Vibrio fischeri</i> ES114                  | Vibrionaceae                            | Gamma-Proteobacteria | VF2012           |
| XanthoP2-A       | <i>Xanthomonas campestris</i>                 | Xanthomonadaceae                        | Gamma-Proteobacteria | XCCEB1459_1200   |

Table S3  
P22-like and P2-like prophages in Salmonella genome sequences

| <i>Salmonella enterica</i> subsp. <i>enterica</i> | O Group     | Serovar        | Number of genome sequences | P22 MCP | CUS-3 MCP | Sf6 MCP | Percentage of genomes with P22-like prophage | P22 Tailspike type†† | Number of tailspike genes† | P2-like Fels-2 MCP >50% | P2-like P88 MCP >50% | P2-like ESSI-2 MCP >45% |
|---------------------------------------------------|-------------|----------------|----------------------------|---------|-----------|---------|----------------------------------------------|----------------------|----------------------------|-------------------------|----------------------|-------------------------|
|                                                   | O:1,3,19    | Serftenberg    | 10                         | 0       | 0         | 0       | 0.0%                                         |                      | 0                          | 5                       | 0                    | 2                       |
|                                                   | O:2         | Paratyphi A    | 139                        | 130     | 0         | 0       | 93.5%                                        | la                   | 130                        | 107                     | 32                   | 124                     |
|                                                   | O:3,10      | Anatum         | 5                          | 2       | 0         | 0       | 40.0%                                        | III / IIb            | 1 / 1                      | 1                       | 0                    | 1                       |
|                                                   | O:3,10      | Give           | 2                          | 1       | 0         | 0       | 50.0%                                        | la                   | 1                          | 1                       | 0                    | 2                       |
|                                                   | O:3,10      | Muenster       | 4                          | 2       | 0         | 0       | 50.0%                                        | III / Vb             | 1 / 1                      | 8                       | 0                    | 0                       |
|                                                   | O:3,10      | Nchanga        | 2                          | 2       | 0         | 0       | 100.0%                                       | III                  | 2                          | 0                       | 0                    | 2                       |
|                                                   | O:3,10      | Uganda         | 1                          | 1       | 0         | 0       | 100.0%                                       | III                  | 1                          | 0                       | 0                    | 0                       |
|                                                   | O:3,10      | Weltvredden    | 2                          | 1       | 0         | 0       | 50.0%                                        | III                  | 1                          | 2                       | 0                    | 1                       |
|                                                   | O:3,10      | London         | 1                          | 0       | 0         | 0       | 0.0%                                         |                      | 0                          | 1                       | 0                    | 1                       |
|                                                   | O:3,10      | Meleagridis    | 1                          | 0       | 0         | 0       | 0.0%                                         |                      | 0                          | 0                       | 0                    | 1                       |
|                                                   | O:4         | Abony          | 1                          | 1       | 0         | 0       | 100.0%                                       | la                   | 1                          | 0                       | 0                    | 0                       |
|                                                   | O:4         | Agona          | 114                        | 11      | 1         | 0       | 10.5%                                        | la / lb              | 8 / 4                      | 111                     | 1                    | 83                      |
|                                                   | O:4         | Brandenburg    | 1                          | 1       | 0         | 0       | 100.0%                                       | la                   | 1                          | 1                       | 0                    | 1                       |
|                                                   | O:4         | Bredeney       | 1                          | 0       | 0         | 0       | 0.0%                                         |                      | 0                          | 0                       | 0                    | 0                       |
|                                                   | O:4         | Chester        | 1                          | 0       | 0         | 0       | 0.0%                                         |                      | 0                          | 1                       | 0                    | 0                       |
|                                                   | O:4         | Derby          | 2                          | 0       | 0         | 0       | 0.0%                                         |                      | 0                          | 0                       | 0                    | 0                       |
|                                                   | O:4         | Heidelberg     | 103                        | 103     | 0         | 0       | 100.0%                                       | la                   | 103                        | 38                      | 0                    | 102                     |
|                                                   | O:4         | Indiana        | 1                          | 0       | 0         | 0       | 0.0%                                         |                      | 0                          | 1                       | 0                    | 0                       |
|                                                   | O:4         | Paratyphi B    | 10                         | 1       | 0         | 0       | 10.0%                                        | la                   | 1                          | 4                       | 2                    | 3                       |
|                                                   | O:4         | Saintpaul      | 6                          | 1       | 0         | 0       | 16.7%                                        | la                   | 1                          | 1                       | 0                    | 2                       |
|                                                   | O:4         | Schwarzengrund | 2                          | 0       | 0         | 2       | 100.0%                                       | XI                   | 1                          | 1                       | 0                    | 1                       |
|                                                   | O:4         | Sloterdijk     | 1                          | 0       | 0         | 0       | 0.0%                                         |                      | 0                          | 0                       | 0                    | 0                       |
|                                                   | O:4         | Stanley        | 1                          | 0       | 0         | 0       | 0.0%                                         |                      | 0                          | 1                       | 0                    | 1                       |
|                                                   | O:4         | Stanleyville   | 1                          | 0       | 0         | 0       | 0.0%                                         |                      | 0                          | 0                       | 0                    | 0                       |
|                                                   | O:4         | Typhimurium    | 445                        | 388     | 0         | 0       | 87.2%                                        | la / lb / Vc         | 381 / 1 / 1                | 30                      | 3                    | 26                      |
|                                                   | O:6,7       | Bareilly       | 103                        | 12      | 0         | 0       | 11.7%                                        | Vb                   | 12                         | 6                       | 0                    | 10                      |
|                                                   | O:6,7       | Braenderup     | 2                          | 0       | 0         | 0       | 0.0%                                         |                      | 0                          | 4                       | 0                    | 0                       |
|                                                   | O:6,7       | Choleraesuis   | 5                          | 5       | 0         | 0       | 100.0%                                       | Va                   | 5                          | 0                       | 0                    | 0                       |
|                                                   | O:6,7       | Hartford       | 1                          | 0       | 0         | 0       | 0.0%                                         |                      | 0                          | 1                       | 0                    | 0                       |
|                                                   | O:6,7       | Infantis       | 5                          | 1       | 0         | 0       | 20.0%                                        | Vb                   | 1                          | 2                       | 0                    | 5                       |
|                                                   | O:6,7       | Livingstone    | 1                          | 1       | 0         | 0       | 100.0%                                       | Vc                   | 1                          | 1                       | 0                    | 0                       |
|                                                   | O:6,7       | Lubbock        | 2                          | 2       | 0         | 0       | 100.0%                                       | Va                   | 2                          | 5                       | 0                    | 2                       |
|                                                   | O:6,7       | Mbandaka       | 1                          | 0       | 0         | 0       | 0.0%                                         | Vc                   | 1                          | 1                       | 0                    | 0                       |
|                                                   | O:6,7/O:54* | Montevideo     | 55                         | 4       | 0         | 0       | 7.3%                                         | Vb / la              | 3 / 1                      | 51                      | 0                    | 4                       |
|                                                   | O:6,7       | Norwich        | 1                          | 0       | 0         | 0       | 0.0%                                         |                      | 0                          | 1                       | 0                    | 0                       |



Table S3  
P22-like and P2-like prophages in Salmonella genome sequences

| <i>Salmonella enterica</i><br>subsp. <i>enterica</i> | O Group | Serovar            | Number of<br>Salmonella<br>genome<br>sequences | P22<br>MCP | CUS-3<br>MCP | Sf6<br>MCP | Percentage<br>of genomes<br>with P22-<br>like<br>prophage | P22 Taispike<br>type†† | Number of<br>taispike<br>genest | Fels-2<br>MCP<br>>50% | P88<br>MCP<br>>50% | ESSI-2<br>MCP<br>>45% |
|------------------------------------------------------|---------|--------------------|------------------------------------------------|------------|--------------|------------|-----------------------------------------------------------|------------------------|---------------------------------|-----------------------|--------------------|-----------------------|
|                                                      | O:6.7   | Ohio               | 1                                              | 1          | 0            | 0          | 100.0%                                                    | Vc                     | 1                               | 0                     | 0                  | 0                     |
|                                                      | O:6.7   | Oranienburg        | 3                                              | 0          | 0            | 0          | 0.0%                                                      |                        | 0                               | 3                     | 0                  | 0                     |
|                                                      | O:6.7   | Paratyphi C        | 1                                              | 0          | 1            | 0          | 100.0%                                                    | Vb                     | 1                               | 0                     | 0                  | 1                     |
|                                                      | O:6.7   | Rissen             | 1                                              | 1          | 0            | 0          | 100.0%                                                    | Vc                     | 1                               | 2                     | 0                  | 0                     |
|                                                      | O:6.7   | Tennessee          | 3                                              | 2          | 0            | 0          | 66.7%                                                     | Va / Vc                | 1 / 1                           | 1                     | 0                  | 2                     |
|                                                      | O:6.7   | Thompson           | 2                                              | 0          | 0            | 0          | 0.0%                                                      |                        | 0                               | 0                     | 0                  | 0                     |
|                                                      | O:6.7   | Virchow            | 3                                              | 0          | 0            | 0          | 0.0%                                                      |                        | 0                               | 1                     | 0                  | 1                     |
|                                                      | O:8     | Albany             | 1                                              | 1          | 0            | 0          | 100.0%                                                    | Vlia                   | 1                               | 0                     | 0                  | 0                     |
|                                                      | O:8     | Bovismorbificans   | 2                                              | 0          | 0            | 0          | 0.0%                                                      |                        | 0                               | 0                     | 0                  | 1                     |
|                                                      | O:8     | Hadar              | 5                                              | 2          | 1            | 0          | 60.0%                                                     | Vlic                   | 3                               | 0                     | 0                  | 0                     |
|                                                      | O:8     | Kentucky           | 15                                             | 0          | 0            | 0          | 0.0%                                                      |                        | 0                               | 0                     | 0                  | 0                     |
|                                                      | O:8     | Litchfield         | 1                                              | 0          | 0            | 0          | 0.0%                                                      |                        | 0                               | 0                     | 0                  | 0                     |
|                                                      | O:8     | Manhattan          | 2                                              | 0          | 0            | 0          | 0.0%                                                      |                        | 0                               | 1                     | 0                  | 0                     |
|                                                      | O:8     | Muenchen           | 4                                              | 0          | 0            | 0          | 0.0%                                                      |                        | 0                               | 3                     | 0                  | 2                     |
|                                                      | O:8     | Newport            | 47                                             | 5          | 3            | 2          | 21.3%                                                     | Vlia / Vlib / Vlid     | 7 / 3 / 6                       | 23                    | 2                  | 10                    |
|                                                      | O:8     | Tallahassee        | 1                                              | 0          | 1            | 0          | 100.0%                                                    | Vlic                   | 1                               | 0                     | 0                  | 0                     |
|                                                      | O:9     | Berta              | 3                                              | 0          | 0            | 0          | 0.0%                                                      |                        | 0                               | 3                     | 0                  | 0                     |
|                                                      | O:9     | Dublin             | 10                                             | 10         | 0            | 0          | 100.0%                                                    | la                     | 10                              | 10                    | 0                  | 0                     |
|                                                      | O:9     | Eastbourne         | 1                                              | 0          | 0            | 0          | 0.0%                                                      |                        | 0                               | 1                     | 0                  | 0                     |
|                                                      | O:9     | Enteritidis        | 318                                            | 1          | 0            | 0          | 0.3%                                                      | III                    | 1                               | 208                   | 0                  | 22                    |
|                                                      | O:9     | Galinarum/Pullorum | 12                                             | 1          | 0            | 0          | 8.3%                                                      | la                     | 1                               | 5                     | 0                  | 0                     |
|                                                      | O:9     | Javiana            | 5                                              | 1          | 0            | 0          | 20.0%                                                     | la                     | 1                               | 5                     | 0                  | 0                     |
|                                                      | O:9     | Miami              | 1                                              | 0          | 0            | 0          | 0.0%                                                      | la                     | 1                               | 0                     | 0                  | 0                     |
|                                                      | O:9     | Napoli             | 1                                              | 0          | 0            | 0          | 0.0%                                                      |                        | 0                               | 0                     | 1                  | 0                     |
|                                                      | O:9     | Panama             | 1                                              | 0          | 0            | 0          | 0.0%                                                      |                        | 0                               | 1                     | 0                  | 0                     |
|                                                      | O:9     | Typhi              | 1755                                           | 0          | 0            | 0          | 0.0%                                                      |                        | 0                               | 3526                  | 68                 | 24                    |
|                                                      | O:9     | 9,12:1,v:          | 1                                              | 1          | 0            | 0          | 100.0%                                                    | lb                     | 1                               | 0                     | 0                  | 2                     |
|                                                      | O:9.46  | Bairdon            | 1                                              | 0          | 0            | 0          | 0.0%                                                      |                        | 0                               | 0                     | 0                  | 0                     |
|                                                      | O:9.46  | Ouakam             | 1                                              | 1          | 0            | 0          | 100.0%                                                    |                        | 0                               | 0                     | 0                  | 0                     |
|                                                      | O:11    | Abaetetuba         | 1                                              | 0          | 0            | 0          | 0.0%                                                      |                        | 0                               | 0                     | 0                  | 0                     |
|                                                      | O:11    | Rubislaw           | 2                                              | 1          | 0            | 0          | 50.0%                                                     | XIV                    | 1                               | 0                     | 2                  | 0                     |
|                                                      | O:13    | Cubana             | 4                                              | 0          | 0            | 0          | 0.0%                                                      |                        | 0                               | 2                     | 0                  | 0                     |
|                                                      | O:13    | Havana             | 1                                              | 0          | 0            | 0          | 0.0%                                                      |                        | 0                               | 1                     | 0                  | 1                     |
|                                                      | O:13    | Mishmarhaemek      | 1                                              | 0          | 0            | 0          | 0.0%                                                      |                        | 0                               | 1                     | 1                  | 0                     |

Table S3  
P22-like and P2-like prophages in Salmonella genome sequences

| <i>Salmonella enterica</i><br>subsp. <i>enterica</i>   | O Group† | Serovar      | Number of<br>genome<br>sequences  | P22<br>MCP | CUS-3<br>MCP | Sf6<br>MCP | Percentage<br>of genomes<br>with P22-<br>like<br>prophage | P22 Tailspike<br>type†† | Number of<br>tailspike<br>genest | Fels-2<br>MCP<br>>50% | P88<br>MCP<br>>50% | ESSI-2<br>MCP<br>>45% |
|--------------------------------------------------------|----------|--------------|-----------------------------------|------------|--------------|------------|-----------------------------------------------------------|-------------------------|----------------------------------|-----------------------|--------------------|-----------------------|
|                                                        | O:13     | Mississippi  | 1                                 | 1          | 0            | 0          | 100.0%                                                    | VIII                    | 1                                | 0                     | 0                  | 0                     |
|                                                        | O:13     | Poona        | 1                                 | 1          | 0            | 0          | 100.0%                                                    | VIII                    | 1                                | 0                     | 0                  | 1                     |
|                                                        | O:13     | Worthington  | 1                                 | 0          | 0            | 0          | 0.0%                                                      |                         | 0                                | 0                     | 0                  | 0                     |
|                                                        | O:16     | Gaminara     | 2                                 | 1          | 0            | 0          | 50.0%                                                     | VI                      | 1                                | 2                     | 1                  | 0                     |
|                                                        | O:18     | Cerro        | 21                                | 21         | 0            | 0          | 100.0%                                                    | IV                      | 21                               | 0                     | 0                  | 0                     |
|                                                        | O:21     | Minnesota    | 2                                 | 1          | 0            | 0          | 50.0%                                                     | X                       | 1                                | 0                     | 0                  | 0                     |
|                                                        | O:28     | Pomona       | 1                                 | 0          | 0            | 0          | 0.0%                                                      |                         | 0                                | 0                     | 0                  | 0                     |
|                                                        | O:30     | Aqua         | 1                                 | 1          | 0            | 0          | 100.0%                                                    | Ia                      | 1                                | 0                     | 0                  | 0                     |
|                                                        | O:30     | Soerenga     | 1                                 | 0          | 0            | 1          | 100.0%                                                    | XII                     | 1                                | 1                     | 0                  | 0                     |
|                                                        | O:30     | Urbana       | 2                                 | 0          | 0            | 0          | 0.0%                                                      |                         | 0                                | 2                     | 0                  | 1                     |
|                                                        | O:35     | Adelaide     | 1                                 | 0          | 0            | 0          | 0.0%                                                      |                         | 0                                | 1                     | 0                  | 0                     |
|                                                        | O:35     | Alachua      | 1                                 | 0          | 0            | 0          | 0.0%                                                      |                         | 0                                | 1                     | 0                  | 0                     |
|                                                        | O:38     | Inverness    | 2                                 | 0          | 0            | 0          | 0.0%                                                      |                         | 0                                | 1                     | 0                  | 0                     |
|                                                        | O:39     | Namur        | 1                                 | 0          | 0            | 0          | 0.0%                                                      |                         | 0                                | 0                     | 0                  | 0                     |
|                                                        | O:39     | Wandsworth   | 1                                 | 1          | 0            | 0          | 100.0%                                                    | XIII                    | 1                                | 0                     | 1                  | 0                     |
|                                                        | O:40     | Johannesburg | 1                                 | 1          | 0            | 0          | 100.0%                                                    | IX                      | 1                                | 1                     | 0                  | 1                     |
| <i>Salmonella enterica</i><br>subsp. <i>arizonae</i>   | O:62     |              | 1                                 | 1          | 0            | 0          | 100.0%                                                    | XV                      | 1                                | 0                     | 0                  | 0                     |
| <i>Salmonella enterica</i><br>subsp. <i>diarizonae</i> |          |              | 2                                 | 0          | 0            | 0          | 0.0%                                                      |                         | 0                                | 1                     | 0                  | 0                     |
| <i>Salmonella enterica</i><br>subsp. <i>houstenae</i>  |          |              | 4                                 | 1          | 0            | 0          | 25.0%                                                     | XVI / V                 | 1 / 1                            | 0                     | 0                  | 2                     |
| <i>Salmonella enterica</i><br>subsp. <i>indica</i>     |          |              | 2                                 | 0          | 0            | 0          | 0.0%                                                      |                         | 0                                | 2                     | 0                  | 0                     |
| <i>Salmonella enterica</i><br>subsp. <i>salamae</i>    |          |              | 2                                 | 1          | 0            | 0          | 50.0%                                                     | XVII                    | 1                                | 0                     | 0                  | 0                     |
| <i>Salmonella bongori</i>                              |          |              | 3                                 | 0          | 0            | 0          | 0.0%                                                      |                         | 0                                | 2                     | 1                  | 1                     |
| <b>Total</b>                                           |          |              | <b>3298</b>                       | <b>729</b> | <b>7</b>     | <b>5</b>   |                                                           |                         | <b>743**</b>                     | <b>4197</b>           | <b>115</b>         | <b>446</b>            |
|                                                        |          |              |                                   |            |              |            |                                                           |                         |                                  |                       |                    |                       |
|                                                        |          |              |                                   |            |              |            |                                                           |                         |                                  |                       |                    |                       |
|                                                        |          |              | <b>Total P22-like MCPs</b>        | <b>741</b> |              |            |                                                           |                         | <b>Total P2-like prophages</b>   | <b>4758</b>           |                    |                       |
|                                                        |          |              | <b>Total P22-like prophages #</b> | <b>744</b> |              |            |                                                           |                         |                                  |                       |                    |                       |
|                                                        |          |              |                                   |            |              |            |                                                           |                         |                                  |                       |                    |                       |
|                                                        |          |              |                                   |            |              |            |                                                           |                         |                                  |                       |                    |                       |
|                                                        |          |              |                                   |            |              |            |                                                           |                         |                                  |                       |                    |                       |
|                                                        |          |              |                                   |            |              |            |                                                           |                         |                                  |                       |                    |                       |
|                                                        |          |              |                                   |            |              |            |                                                           |                         |                                  |                       |                    |                       |
|                                                        |          |              |                                   |            |              |            |                                                           |                         |                                  |                       |                    |                       |
|                                                        |          |              |                                   |            |              |            |                                                           |                         |                                  |                       |                    |                       |

**Table S3 footnotes**

The table was completed on July 31, 2015. GenBank entries with only "WP\_XXXXX" accession numbers are not included since the strain names and nucleic acid context cannot be determined.

† O antigen groups are from Grimont, P., Weill, F. 2007. Antigenic Formulae of the *Salmonella* Serovars, (9th ed.) Paris: WHO Collaborating Center for Reference and Research on *Salmonella*, Institut Pasteur. (Available at: [http://www.pasteur.fr/sante/clre/cadrechr/salmoms/WKLM\\_En.pdf](http://www.pasteur.fr/sante/clre/cadrechr/salmoms/WKLM_En.pdf))

†† Where several types of P22-like tailspikes are present in different prophages they are separated by slashes (/). Red text highlights the anomalous tailspikes discussed in the text.

\* O:6,7 antigen is expressed in Montevideo serotype cells when plasmid controlling O:54 antigen is not present.

\*\* The total numbers of MCPs and tailspikes are not the same. This is because MCP or tailspike genes are occasionally missing from the translated annotation due to their falling between contigs, having been deleted from the prophage or not being correctly annotated. In addition several Newport prophages have two tailspike genes.

# 741 MCP genes and 3 tailspike genes whose associated MCP genes are missing or not annotated.

Table S4  
P22-like phages and prophages used this study

| <b>A</b>  | P22-like authentic phages                                                                                  |                  |                    |          |
|-----------|------------------------------------------------------------------------------------------------------------|------------------|--------------------|----------|
| Phage     | Host                                                                                                       | Accession number | genome orientation | MCP type |
| 22        | <i>Salmonella enterica</i> (Typhimurium)                                                                   | KR296686         | P22                | P22      |
| 25        | <i>Salmonella enterica</i> (Typhimurium)                                                                   | KR296687         | P22                | P22      |
| 34        | <i>Salmonella enterica</i> (Typhimurium)                                                                   | KR296688         | P22                | P22      |
| APSE-2    | <i>Hamiltonella defensa</i> *                                                                              | EU794049         | APSE-1             | Sf6      |
| ASPE-1    | <i>Hamiltonella defensa</i> *                                                                              | AF157835         | APSE-1             | Sf6      |
| CUS-3     | <i>Escherichia coli</i>                                                                                    | CP000711         | Sf6                | CUS-3    |
| Emek      | <i>Salmonella enterica</i> (Haardt)                                                                        | JQ806763         | P22                | P22      |
| epsilon34 | <i>Salmonella enterica</i> (Anatum)                                                                        | EU570103         | P22                | P22      |
| g341      | <i>Salmonella enterica</i> (Anatum)                                                                        | NC_013059        | P22                | P22      |
| HK620     | <i>Escherichia coli</i>                                                                                    | AF335538         | Sf6                | Sf6      |
| IME10     | <i>Escherichia coli</i>                                                                                    | JN600960         | P22                | P22      |
| L         | <i>Salmonella enterica</i> (Typhimurium)                                                                   | AY795968†        | P22                | P22      |
| ø20       | <i>Salmonella enterica</i> (Typhimurium)                                                                   | GQ422450         | P22                | P22      |
| ø75       | <i>Salmonella enterica</i> (Typhimurium)                                                                   | GQ422451         | P22                | P22      |
| P22       | <i>Salmonella enterica</i> (Typhimurium)                                                                   | BK000583         | P22                | P22      |
| SE1       | <i>Salmonella enterica</i> (Typhimurium)                                                                   | NC_011802        | P22                | P22      |
| SEN22     | <i>Salmonella enterica</i> (Diarizonae)                                                                    | KT630648         | P22                | P22      |
| SETP1     | <i>Salmonella enterica</i> (Eneritidis)                                                                    | EF151184#        | -                  | -        |
| Sf101     | <i>Shigella flexneri</i>                                                                                   | KJ832078         | Sf6                | CUS-3    |
| Sf6       | <i>Shigella flexneri</i>                                                                                   | AF547987         | Sf6                | Sf6      |
| SPC-P1    | <i>Salmonella enterica</i> (TyphiC)                                                                        | CP000857         | Sf6                | CUS-3    |
| SPN9CC    | <i>Salmonella enterica</i> (Typhimurium)                                                                   | JF900176         | P22                | P22      |
| ST104     | <i>Salmonella enterica</i> (Typhimurium)                                                                   | AB102868         | P22                | P22      |
| ST160     | <i>Salmonella enterica</i> (Typhimurium)                                                                   | NC_014900        | P22                | P22      |
| ST64T     | <i>Salmonella enterica</i> (Typhimurium)                                                                   | AY052766         | P22                | P22      |
|           | * virion-like particles not yet shown to be infectious<br>† our unpublished sequence<br># partial sequence |                  |                    |          |

Table S4  
P22-like phages and prophages used this study

| <b>B</b> | <i>Enterobacteriaceae</i> P22-like prophages                  |                                              |                                                         |          |
|----------|---------------------------------------------------------------|----------------------------------------------|---------------------------------------------------------|----------|
|          | Prophage Host                                                 | MCP locus_tag                                | genome orientation                                      | MCP type |
|          | <i>Arsenophonus nasoniae</i> *                                | ARN_26010                                    | -                                                       | Sf6      |
|          | <i>Citrobacter</i> sp. BIDMC108                               | SK40_00812                                   | Sf6                                                     | P22      |
|          | <i>Cronobacter sakazakii</i> 696                              | BN128_2797                                   | P22                                                     | P22      |
|          | <i>Cronobacter malonaticus</i> †                              | WP_032971372*                                | -                                                       | -        |
|          | <i>Enterobacter</i> sp.GN02548*                               | ABR33_05860                                  | -                                                       | CUS-3    |
|          | <i>Enterobacter aerogenes</i> UC147                           | P850_03405                                   | APSE-1                                                  | P22      |
|          | <i>Erwinia tracheiphila</i> BufGFH                            | SY86_19110                                   | APSE-1 early right??                                    | P22      |
|          | <i>Escherichia coli</i> B7A                                   | EcB7A_4179                                   | Sf6                                                     | Sf6      |
|          | <i>Escherichia coli</i> CVM N38428PS                          | PU66_07355                                   | Sf6                                                     | CUS-3    |
|          | <i>Escherichia coli</i> W                                     | EschWDRAFT_1163                              | Sf6                                                     | P22      |
|          | <i>Klebsiella pneumoniae</i> SB3432                           | KPR_2793                                     | Sf6                                                     | CUS-3    |
|          | <i>Kluyvera intermedia</i> CAV1151                            | AB182_19130                                  | P22                                                     | P22      |
|          | <i>Leclercia adecarboxylata</i> †                             | WP_039031990*                                | -                                                       | -        |
|          | <i>Morganella morganii</i> KT                                 | MU9_2902                                     | P22                                                     | P22      |
|          | <i>Pantoea</i> sp. PSNIH2                                     | PSNIH2_13380                                 | P22                                                     | P22      |
|          | <i>Pectobacterium carotovorum</i> BCS2                        | RC83_13195                                   | P22                                                     | P22      |
|          | <i>Pectobacterium carotovorum</i> LMG21371                    | KS44_06225                                   | P22                                                     | CUS-3    |
|          | <i>Pluralibacter gergoviae</i> DL84A27                        | ABW09_23385                                  | -                                                       | P22      |
|          | <i>Proteus mirabilis</i> ATCC7002                             | DR94_520                                     | Prot1                                                   | P22      |
|          | <i>Providencia rettgeri</i> DSM 1131                          | PROVRETT_06010                               | P22                                                     | Sf6      |
|          | <i>Providencia rettgeri</i> †                                 | WP_048606460*                                | -                                                       | -        |
|          | <i>Salmonella enterica</i> CVM19536                           | SEEN536_00900                                | -                                                       | Sf6      |
|          | <i>Serratia marcescens</i> VGH107                             | F518_22685                                   | P22                                                     | Sf6      |
|          | <i>Serratia plymuthica</i> AS9                                | SerAS9_2688                                  | APSE-1 (ø80 int org)                                    | P22      |
|          | <i>Shigella flexneri</i> 2002017                              | SF xv_0342                                   | P22                                                     | P22      |
|          | <i>Shimwella blattae</i> DSM 4481                             | EBL_c21750                                   | P22                                                     | Sf6      |
|          | <i>Tatumella morbiroisei</i> LMG23360                         | HA49_08570                                   | P22                                                     | P22      |
|          | <i>Xenorhabdus bovienii</i> CS03                              | XBW1_3034                                    | Prot1                                                   | P22      |
|          | <i>Yersinia aleksiciae</i> 159                                | ACZ76_14855                                  | P22                                                     | Sf6      |
|          | <i>Yersinia kristensenii</i> * ATCC33639                      | DJ57_2548                                    | P22                                                     | P22      |
|          | * Rather short contig so not included in genome plot Figure 6 | * Accession number (Locus_tag not available) | "-" indicates contig too short to determine orientation |          |
|          | † Strain names and whole prophage sequence not available      |                                              |                                                         |          |

Table S4  
P22-like phages and prophages used this study

| C | <i>Salmonella</i> P22-like prophages                                     |                      |                           |  |
|---|--------------------------------------------------------------------------|----------------------|---------------------------|--|
|   | <b>Prophage Host</b>                                                     | <b>MCP locus_tag</b> |                           |  |
|   | <i>Salmonella enterica</i> serovar Paratyphi AY09620                     | YNSPA_2311           |                           |  |
|   | <i>Salmonella enterica</i> serovar Heidelberg SL476                      | SeHA_C0403           |                           |  |
|   | <i>Salmonella enterica</i> serovar Agona 3432613                         | SEEA2613_05333       |                           |  |
|   | <i>Salmonella enterica</i> serovar Typhimurium U288                      | STU288_12845         |                           |  |
|   | <i>Salmonella enterica</i> serovar Derby CVMN51289                       | AEX05_09315          |                           |  |
|   | <i>Salmonella enterica</i> serovar Albany ATCC51960                      | SEEA1960_00245       |                           |  |
|   | <i>Salmonella enterica</i> serovar Hadar 05P066                          | SeH_A0879            |                           |  |
|   | <i>Salmonella enterica</i> serovar Newport CVM19536                      | SEEN536_00900        |                           |  |
|   | <i>Salmonella enterica</i> serovar Choleraesuis SCB-67                   | SCH_0357             |                           |  |
|   | <i>Salmonella enterica</i> serovar Bareilly CFSAN00219                   | CFSAN00219_          |                           |  |
|   | <i>Salmonella enterica</i> serovar Montevideo 8387                       | SEEM8387_07975       |                           |  |
|   | <i>Salmonella enterica</i> serovar Anatum USMARC-1735                    | AW50_6230            |                           |  |
|   | <i>Salmonella enterica</i> serovar Cerro CFSAN001588                     | CFSAN001588_015920   |                           |  |
|   | <i>Salmonella enterica</i> serovar Dublin SL1438                         | SEEDSL_005061        |                           |  |
|   | <i>Salmonella enterica</i> subspecies <i>Arizonae</i> RSK2980            | SARI_02647           |                           |  |
|   |                                                                          |                      |                           |  |
| D | Paratyphi A P22-like                                                     |                      |                           |  |
|   | <b>Prophage Host</b>                                                     | <b>MCP locus_tag</b> | <b>Isolation location</b> |  |
|   | <i>Salmonella enterica</i> serovar Paratyphi A (no strain name reported) | PA045_3010           | -                         |  |
|   | <i>Salmonella enterica</i> serovar Paratyphi A AYN09620                  | YNSPA_2311           | Yunnan, China             |  |
|   | <i>Salmonella enterica</i> serovar Paratyphi A AKU_12601                 | SSPA2232e            | Pakistan                  |  |
|   | <i>Salmonella enterica</i> serovar Paratyphi A CMCC50093                 | ACN89_12045          | Beijing, China            |  |
|   | <i>Salmonella enterica</i> serovar Paratyphi A GZ9A00052                 | GZSPA_2297           | Guizhou, China            |  |
|   | <i>Salmonella enterica</i> serovar Paratyphi A JX05-19                   | JXSPA_2296           | Jiangxi, China            |  |
|   | <i>Salmonella enterica</i> serovar Paratyphi A CMCC50503                 | LW89_14285           | Jaingsu, China            |  |
|   | <i>Salmonella enterica</i> serovar Paratyphi A (no strain reported)      | PA136_4071           | -                         |  |
|   | <i>Salmonella enterica</i> serovar Paratyphi A CMCC50973                 | IT63_14940           | Jaingsu, China            |  |
|   |                                                                          |                      |                           |  |
|   |                                                                          |                      |                           |  |
|   |                                                                          |                      |                           |  |
|   |                                                                          |                      |                           |  |
|   |                                                                          |                      |                           |  |
|   |                                                                          |                      |                           |  |
|   |                                                                          |                      |                           |  |
|   |                                                                          |                      |                           |  |
|   |                                                                          |                      |                           |  |
|   |                                                                          |                      |                           |  |
|   |                                                                          |                      |                           |  |

Table S4  
P22-like phages and prophages used this study

| <b>E</b> | Heidelberg P22-like prophages                                   |                      |                           |
|----------|-----------------------------------------------------------------|----------------------|---------------------------|
|          | <b>Prophage Host</b>                                            | <b>MCP locus_tag</b> | <b>Isolation location</b> |
|          | <i>Salmonella enterica</i> serovar Heidelberg 82-2052           | SEEH2052_04713       | Maine, USA                |
|          | <i>Salmonella enterica</i> serovar Heidelberg ABB07-SB3031      | TJ50_03995           | British Columbia, CA      |
|          | <i>Salmonella enterica</i> serovar Heidelberg B182              | SU5_01004            | France                    |
|          | <i>Salmonella enterica</i> serovar Heidelberg CVM N45397        | AEU76_20940          | Minnesota, USA            |
|          | <i>Salmonella enterica</i> serovar Heidelberg N26457            | SEEH6457_20825       | Colorado, USA             |
|          | <i>Salmonella enterica</i> serovar Heidelberg SL476             | SeHA_C0403           | Minnesota, USA            |
|          | <i>Salmonella enterica</i> serovar Heidelberg SL486             | SeHB_A0358           | Georgia, USA              |
| <b>F</b> | Newport P22-like prophages                                      |                      |                           |
|          | <b>Prophage Host</b>                                            | <b>MCP locus_tag</b> | <b>Isolation location</b> |
|          | <i>Salmonella enterica</i> serovar Newport CVM 19470            | SEEN470_21064        | Vietnam                   |
|          | <i>Salmonella enterica</i> serovar Newport CVM 19536            | SEEN536_00900        | Vietnam                   |
|          | <i>Salmonella enterica</i> serovar Newport CVM 22425            | SEEN425_002235       | Arizona, USA              |
|          | <i>Salmonella enterica</i> serovar Newport CVM 22462            | SEEN462_0001185      | Arizona, USA              |
|          | <i>Salmonella enterica</i> serovar Newport CVM 4176             | SEEN176_15035        | California, USA           |
|          | <i>Salmonella enterica</i> serovar Newport Henan_3              | G208_21144           | Henan, China              |
|          | <i>Salmonella enterica</i> serovar Newport JS09102              | G209_24390           | Jiangsu, China            |
|          | <i>Salmonella enterica</i> serovar Newport SH111077             | G206_16997           | Shanghai, China           |
|          | <i>Salmonella enterica</i> serovar Newport Shandong_3           | G207_20579           | Shandong, China           |
|          | <i>Salmonella enterica</i> serovar Newport USMARC-S3124.1       | SN31241_18260        | USA                       |
| <b>G</b> | Typhimurium prophages                                           |                      |                           |
|          | <b>Prophage Host</b>                                            | <b>MCP locus_tag</b> | <b>Isolation location</b> |
|          | <i>Salmonella enterica</i> serovar Typhimurium 34502            | SEET4502_15275       | –                         |
|          | <i>Salmonella enterica</i> serovar Typhimurium ABB1162-2        | TJ39_05580           | British Columbia, CA      |
|          | <i>Salmonella enterica</i> serovar Typhimurium CFSAN001921      | CFSAN001921_15475    | New York, USA             |
|          | <i>Salmonella enterica</i> serovar Typhimurium CVM N51254       | AEW79_08460          | Connecticut, USA          |
|          | <i>Salmonella enterica</i> serovar Typhimurium D23580           | STMMW_03811          | Malawi                    |
|          | <i>Salmonella enterica</i> serovar Typhimurium DT104            | DT104_03541          | –                         |
|          | <i>Salmonella enterica</i> serovar Typhimurium DT104 EWH6       | ERS198263_02378      | United Kingdom            |
|          | <i>Salmonella enterica</i> serovar Typhimurium FORC_015         | ZV79_2330            | South Korea               |
|          | <i>Salmonella enterica</i> serovar Typhimurium L-3553           | STL3553_c03780       | –                         |
|          | <i>Salmonella enterica</i> serovar Typhimurium TN061786         | SEE_01911            | –                         |
|          | <i>Salmonella enterica</i> serovar Typhimurium U288             | STU288_12845         | –                         |
|          | <i>Salmonella enterica</i> serovar Typhimurium var.5 CVM N43832 | AEU38_10780          | New York, USA             |

Table S4  
P22-like phages and prophages used this study

| <b>H</b> | Prophage P22-like tailspikes                  |                     |                |  |
|----------|-----------------------------------------------|---------------------|----------------|--|
|          | <i>Salmonella enterica</i> serovar and strain | Tailspike locus_tag | Tailspike type |  |
|          | 9,12:l,v:- str. 94293                         | N925_10475          | Ib             |  |
|          | Abony 0014                                    | SEEA0014_11145      | Ia             |  |
|          | Agona 648586-1                                | SEEA5861_16245      | Ib             |  |
|          | Albany_ATCC 51960(A)                          | SEEA1960_00180      | VIIa           |  |
|          | Anatum USDA-ARS-USMARC-1735                   | AW50_6260           | Iib            |  |
|          | AnatumCDC06-0532                              | AW57_13240          | III            |  |
|          | Aqua NVSL2001                                 | I654_10070          | Ia             |  |
|          | Arizonae serovar 62:z4,z23:- str. RSK2980     | SARI_02638          | XIV            |  |
|          | Bareilly CFSAN000183                          | SEEB0183_09067      | Vb             |  |
|          | Brandenburg CFSAN024765                       | QS22_03720          | Ia             |  |
|          | Cerro 87                                      | NI35_4331           | IV             |  |
|          | Choleraesuis SC-B67                           | SCH_0367            | Va             |  |
|          | Dublin SL1438                                 | SEEDSL_005126       | Ia             |  |
|          | Enteritidis 3402                              | SEEE3402_02210      | III            |  |
|          | Gaminara ATCC BAA-711                         | SEEGA711_14315      | VI             |  |
|          | Give var. 15 CFSAN004343                      | CFSAN004343_03735   | Ia             |  |
|          | Hadar ABB1048-1                               | TJ45_04405          | VIIc           |  |
|          | Heidelberg SL476                              | SeHA_C0413          | Ia             |  |
|          | Houtenae ATCC BAA-1581                        | SEHO0A_00503        | XV             |  |
|          | Houtenae serovar 16:z4,z32:-- str. RKS3027    | D088_680001         | VI             |  |
|          | Infantis CFSAN024780                          | QS05_16285          | Vb             |  |
|          | Javiana PRS_2010_0720                         | SEEJ0720_04071      | Ia             |  |
|          | Johannesburg S5-703                           | LTSEJOH_2243        | VIII           |  |
|          | Livingstone CKY-S4                            | VN13_12135          | Vc             |  |
|          | Lubbock 10TTU468                              | TR76_09235          | Va             |  |
|          | Miami 1923                                    | SEEM1923_08240      | Ia             |  |
|          | Minnesota ATCC 49284                          | SEEM9284_03916      | IX             |  |
|          | Mississippi A4-633                            | LTSEMIS_1115        | X              |  |
|          | Montevideo 4441 H                             | SEEM41H_02992       | Vb             |  |
|          | Montevideo CFSAN004346                        | CFSAN004346_01470   | Ia             |  |
|          | Muenster 0315                                 | SEEM0315_05630      | III            |  |
|          | Muenster CFSAN004344                          | CFSAN004344_03295   | Vb             |  |
|          | Nchanga CFSAN001091                           | CFSAN001091_05799   | III            |  |
|          | Newport CVM 4176                              | SEEN176_15095       | VIIa           |  |
|          | Newport CVM 4176                              | SEEN176_15100       | VIIId          |  |
|          | Newport CVM2242                               | SEEN425_002285      | VIIb           |  |
|          | Ohio CFSAN001079                              | CFSAN001079_21649   | Vc             |  |
|          | Paratyphi A ATCC 9150                         | SPA2388             | Ia             |  |
|          | Paratyphi B ATCC 8759                         | SEEPB759_13629      | Ia             |  |
|          | Poona ATCC BAA-1673                           | SEEP1673_06839      | X              |  |
|          | Pullorum S06004                               | I137_12070          | Ia             |  |
|          | Rissen 150                                    | SEER_02967          | Vc             |  |
|          | Rubislaw A4-653                               | LTSERUB_1231        | XIII           |  |

Table S4  
P22-like phages and prophages used this study

| <b>H</b> cont. | Tailspikes in tree                            |                     |                |  |
|----------------|-----------------------------------------------|---------------------|----------------|--|
|                | <i>Salmonella enterica</i> serovar and strain | Tailspike locus_tag | Tailspike type |  |
|                | Saint Paul SARA26                             | SES26_19449         | Ia             |  |
|                | Salamae serovar 58:l,z13,z28:z6 str. 00-0163  | SES60163_06541      | XVI            |  |
|                | Schwarzengrund SL480                          | SeSB_A0555          | XI             |  |
|                | Soerenga 695                                  | SEES0695_12821      | XII            |  |
|                | Tallahassee 0012                              | SEET0012_06891      | VIIc           |  |
|                | Tennessee TXSC_TXSC08-19                      | SEET0819_19095      | Va             |  |
|                | Typhimurium CFSAN001921                       | CFSAN001921_15420   | Ic             |  |
|                | Typhimurium D23580                            | STMMW_03901         | Ib             |  |
|                | Typhimurium FORC_015                          | ZV79_2330           | Vc             |  |
|                | Typhimurium U228                              | STU288_12795        | Ia             |  |
|                | Uganda R8-3404                                | LTSEUGA_0549        | III            |  |
|                | Wandsworth A4-580                             | LTSEWAN_1004        | XII            |  |
|                | Weltevreden 2007-60-3289-1                    | SENTW_2521          | III            |  |



SUPPLEMENTARY MATERIAL FIGURES

Figure S1

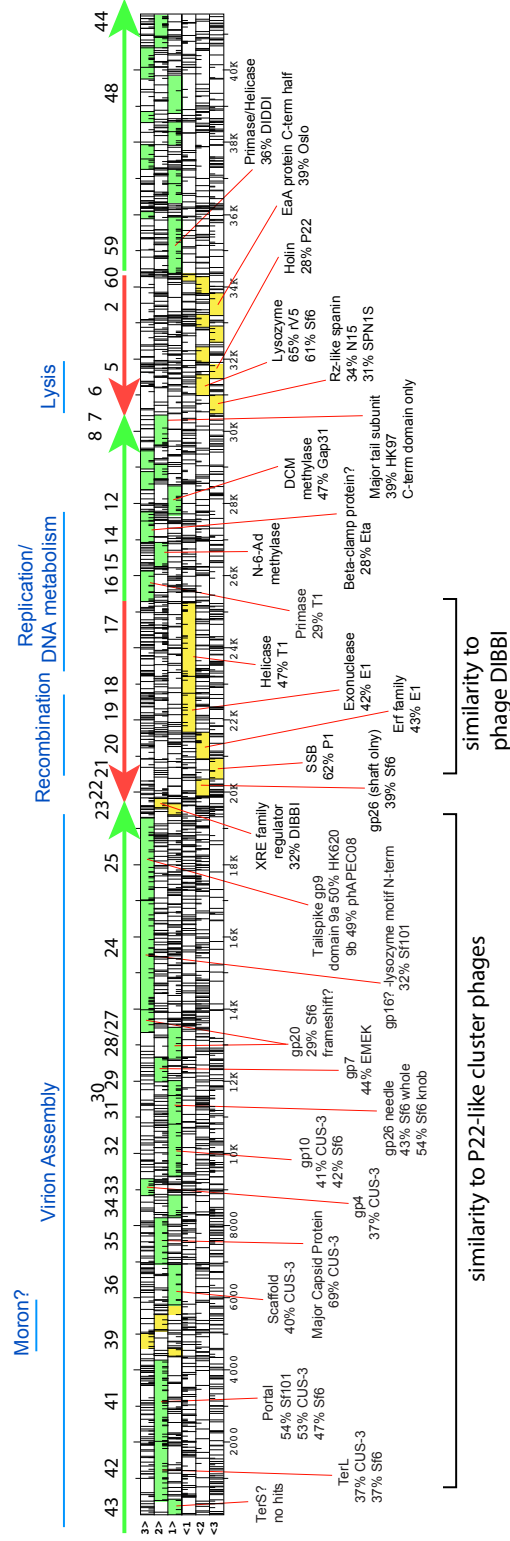

**Figure S1. Phage IME-EC2 map and gene database matches.**

The phage IME-EC2 genome is shown with the six possible reading frames (indicated at left) with stop codons marked as vertical lines that span the frame rectangle, and AUG codons are indicated by short vertical lines. Open reading frames called as genes are indicated by green and yellow rectangles (transcribed rightward and leftward, respectively). Our gene calls between genes 1 and 5 and between 44 and 59 do not precisely match those of Hua *et al.* (2014); we favor our calls since they leave very little intergenic space as is typical of phage genomes. The opened circular map has been re-oriented from the annotation GenBank accession number KF591601, so that the putative virion assembly genes form the left half of the genome. Above several functional clusters are indicated in blue, selected IME-EC2 locus\_tag (gene) numbers of Hua *et al.* (2014) are shown in black, and transcriptional direction (with no operon connotation) is indicated by red and green arrows. Below the ORF map red lines point to the most similar phage proteins found in our analysis. In each graphic annotation the predicted function is given above and similarity to a protein encoded by the indicated phage is given below; no red line indicates there are no good matches in the current sequence database.

In this annotation it is clear that the IME-EC2 virion assembly genes are homologous to and syntenic with those of the P22-like cluster of phages that includes phages Sf6 and CUS-3 (Casjens *et al.*, 2004; King *et al.*, 2007), and “gp#” in the figure refers to the phage P22 gene product names. We note the following additional facts about the IME-EC2 virion assembly genes: (1) genes 43 and 42 overlap by 7 codons, which is typical of terS-terL overlaps in the P22-like phage cluster, suggesting that 43 may encode a TerS protein (TerS proteins are extremely variable, so its lack of homology to known TerS’s is not surprising). (2) Genes 37-40 have no homologues in the P22-like phages (or in other organisms), and we suggest that they are likely a late operon moron (Hendrix *et al.*, 2000; Juhala *et al.*, 2000; Cumby, Davidson, and Maxwell, 2012) that is not involved in virion assembly. (3) Two non-essential genes in this region of the P22-like phages are Orf186 and gene 14. There are syntenic but not recognizably homologous genes, 34 and 30 respectively, in IME-EC2 that could have analogous functions to those poorly understood P22-like phage genes; more experimental work will be required to determine if this is true. Curiously, IME-EC2 genes 21 and 8 are homologous to particular domains of phage Sf6 (a P22-like phage) tail needle shaft, a trimeric coiled-coil (Olia, Casjens, and Cingolani, 2007), and the C-terminal domain of the HK97 tail shaft protein (HK97 has a long non-contractile tail that is similar to the phage lambda tail). The latter is thought not to be

necessary the formation of the actual tail structure in such lambda-like tails; both of these IME-EC2 genes lie in what are likely regions that are expressed early and so may have functions other than virion assembly. (4) The two adjacent IME-EC2 genes 27 and 28 have homology to the 3'- and 5'-sections of P22 gene 20, respectively. This could be the result of an IME-EC2 sequencing frameshift error, or it may indicate a separation of P22 gp20 into two parts so that its function(s) is carried out by two IME-EC2 proteins.

Figure S2

Enterobacteriaceae P2 supercluster MCP dot plot

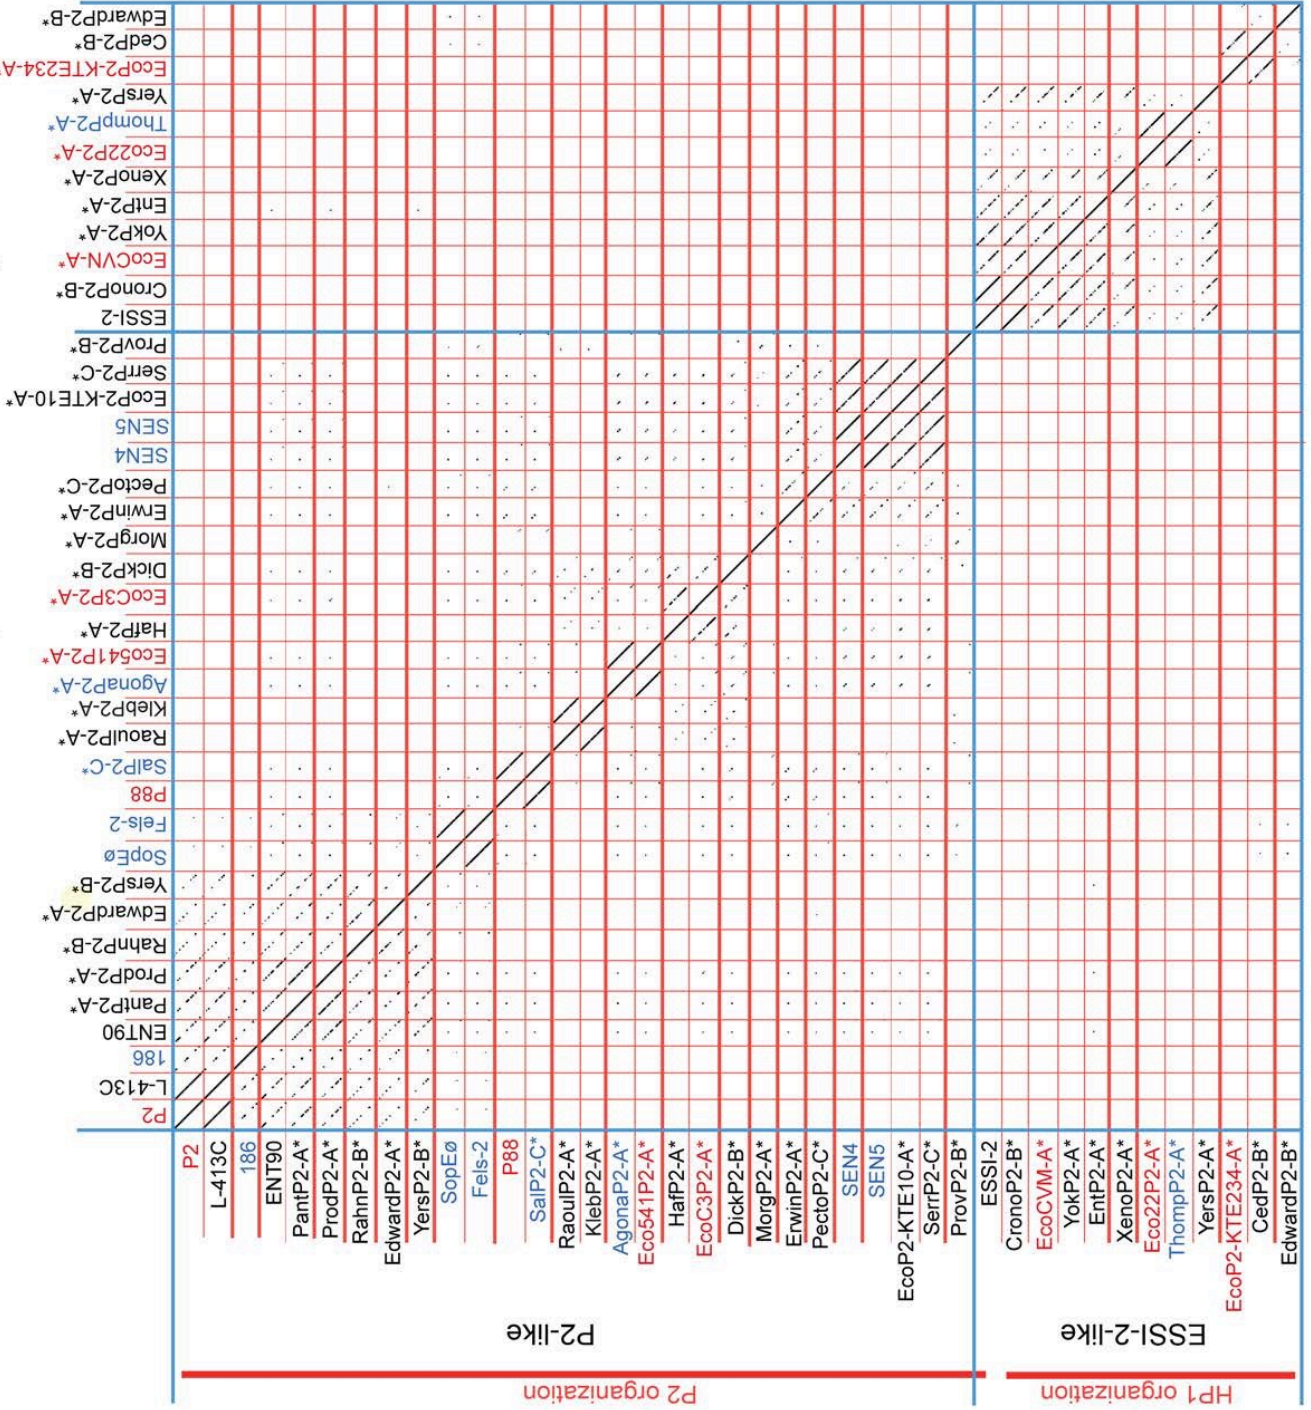

**Figure S2. Dot plot analysis of P2-like prophage MCPs from the *Enterobacteriaceae*.**

On the left phage and prophage names are shown (red text, *E. coli* host; blue, *Salmonella* host; black, other hosts) and asterisks (\*) denote prophage sequences. Blue lines separate the two phage clusters, and thick red lines separate subclusters that are defined in the Figure 2 genome dot plot. Phages and prophages in the plot are listed with host species, genome accession numbers, and MCP locus tags in Table S2A and S2B, respectively. The dot plot was produced by Gepard (Krumstiek, Arnold, and Rattei, 2007) at a word size setting of 9.

Figure S3

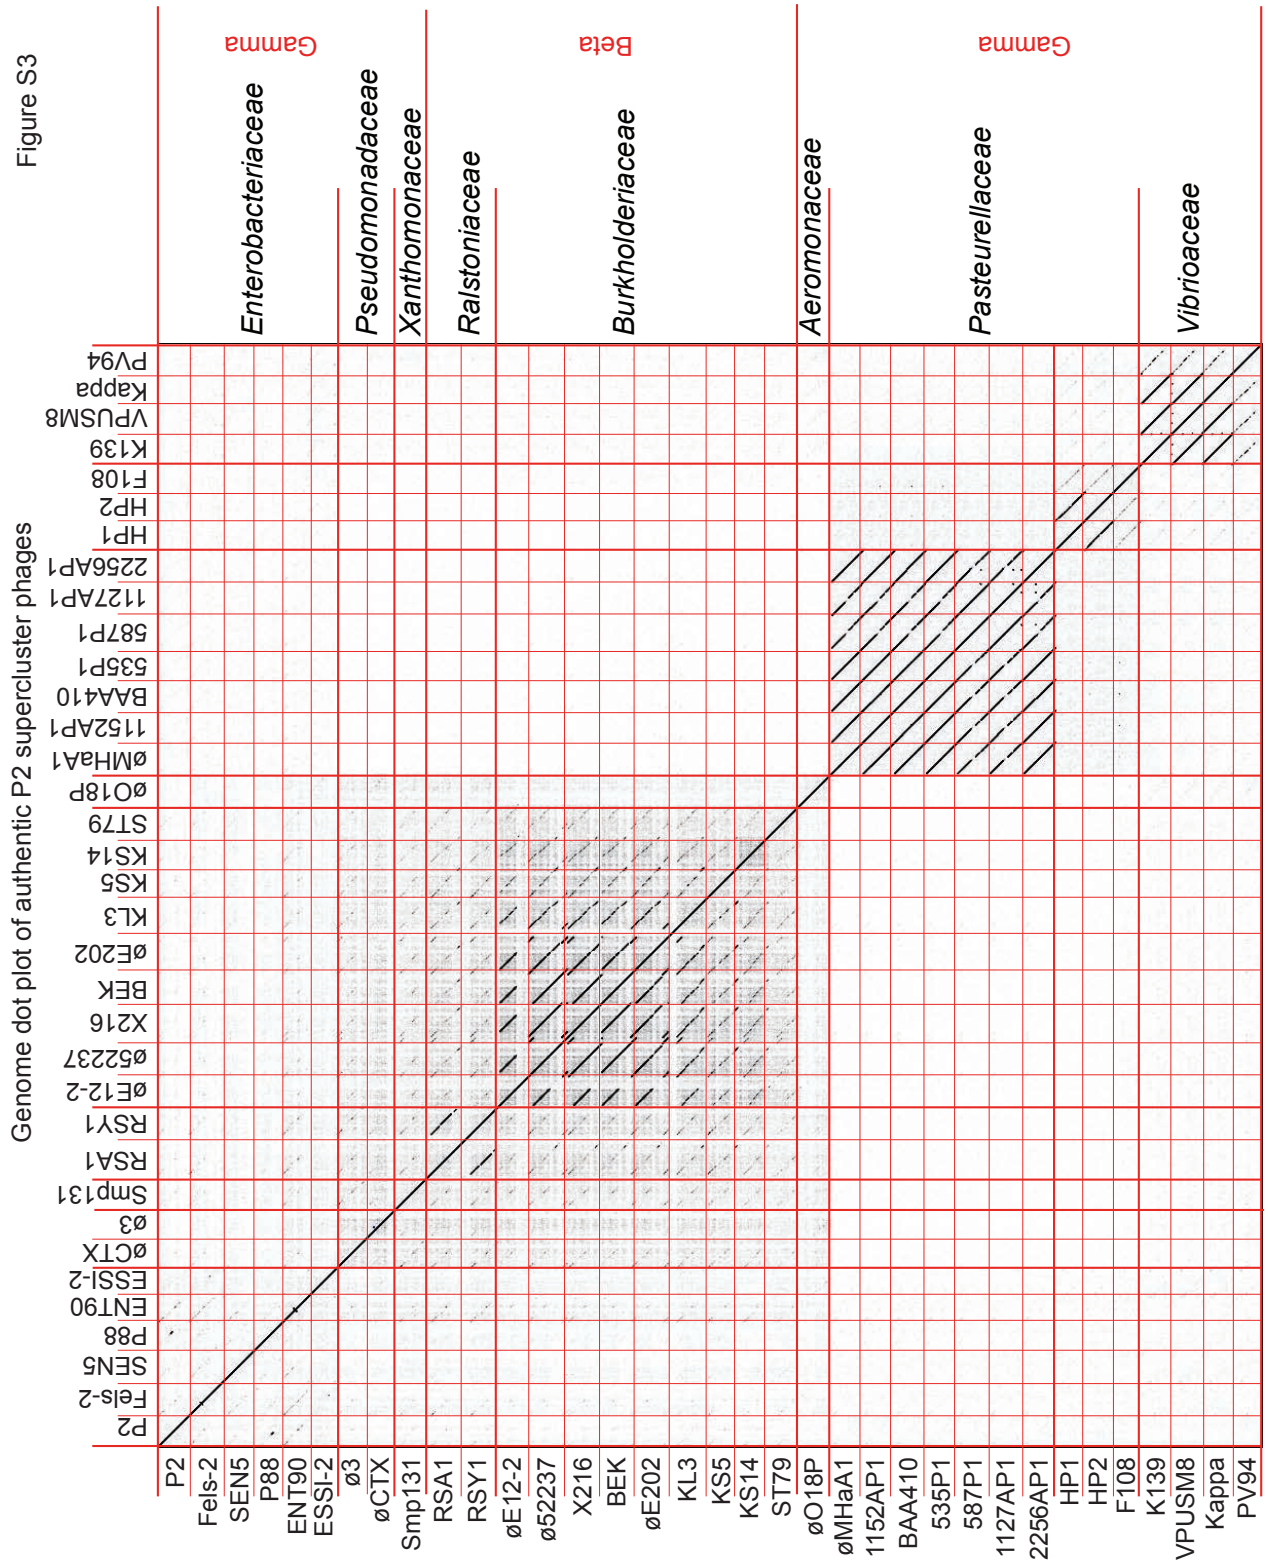

**Figure S3. Genome dot plot of authentic P2 supercluster phages.**

Phage names are given on the left and top; only representative authentic *Enterobacteriaceae* phage genomes are included. Thin red lines separate individual phage and prophage genomes and thick red line separate the bacterial host taxa shown at the right. Phages in the plot are listed with host species and genome accession numbers in Table S2A and S2C. The dot plot was produced using Gepard (Krumstiek, Arnold, and Rattei, 2007) at a word size setting of 11.

Figure S4

P2-like MCP plot

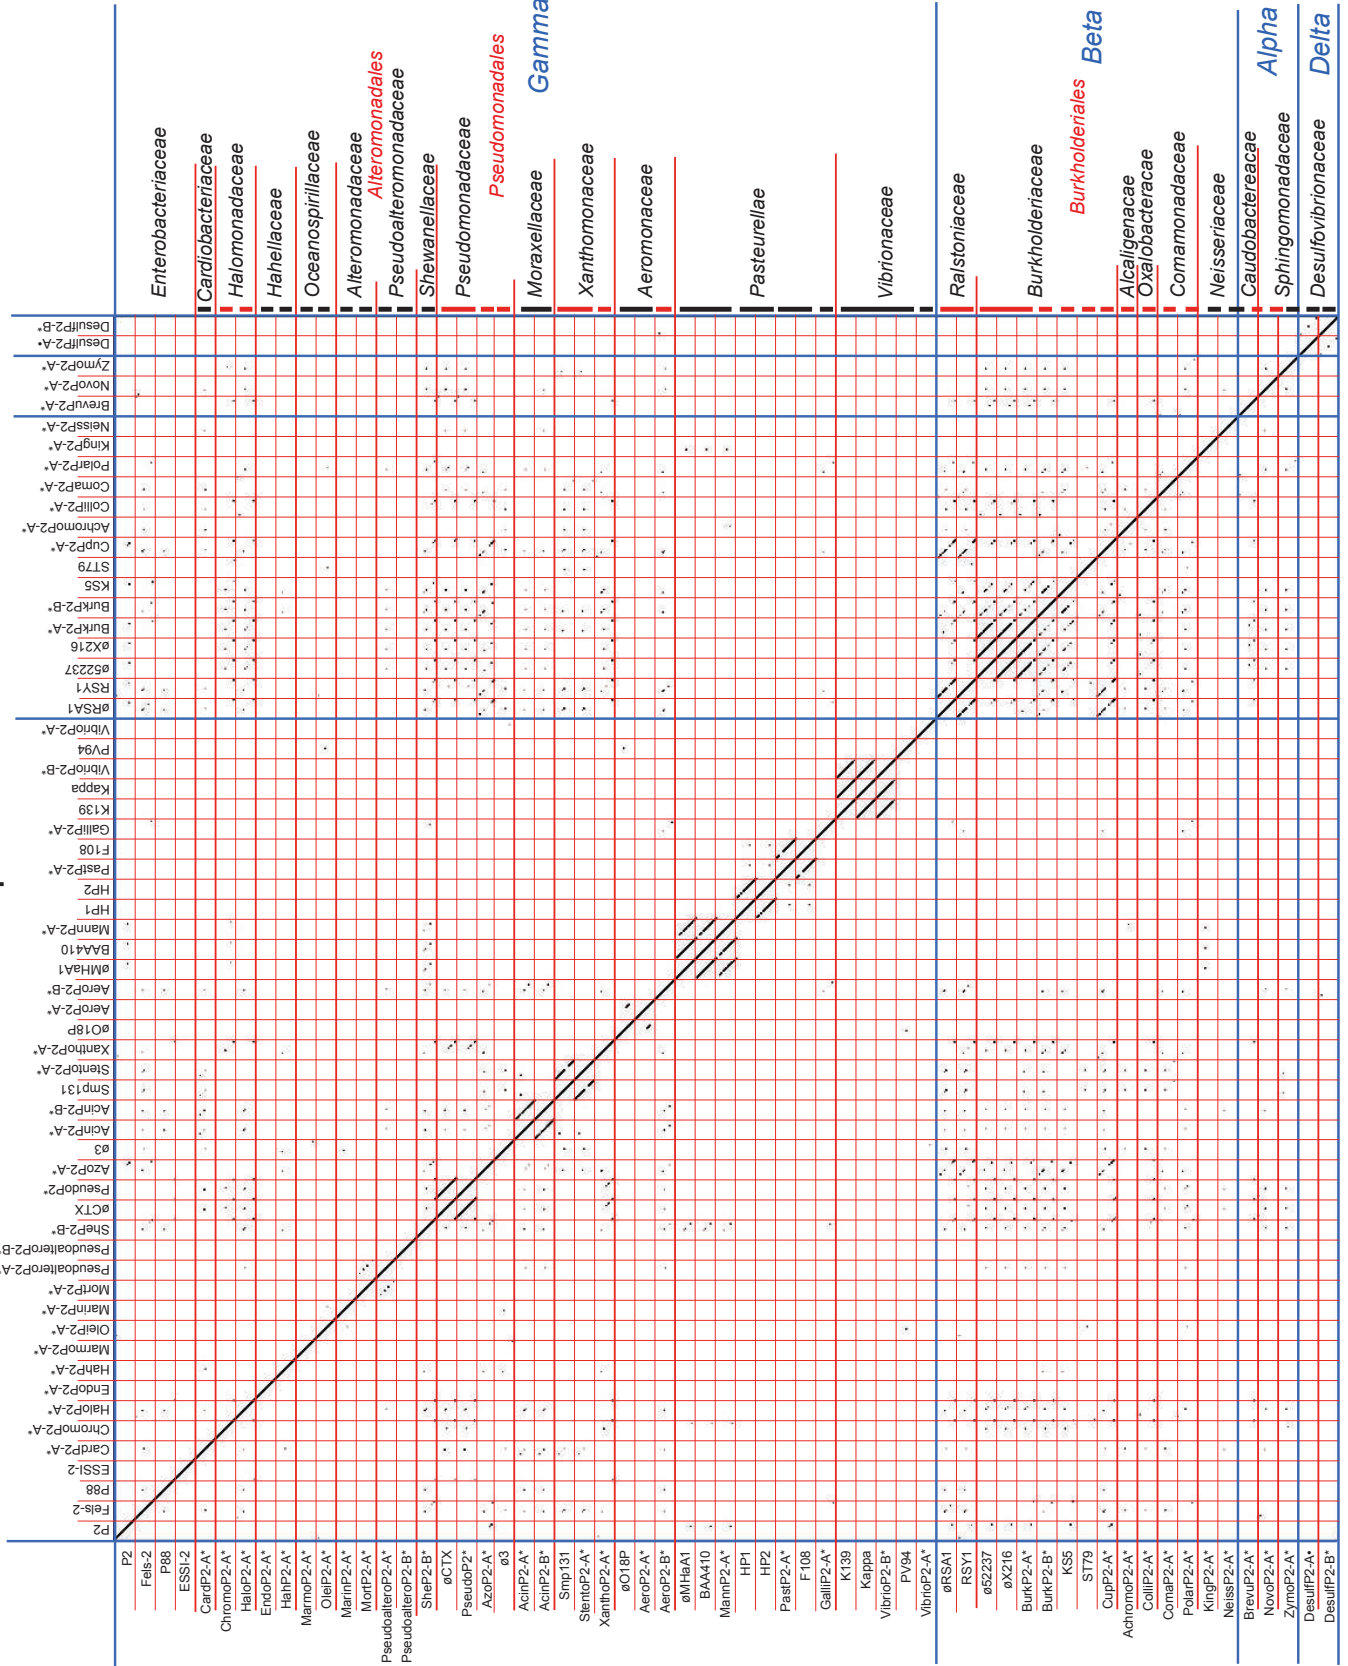



**Figure S4. Dot plot analysis of MCPs of P2-like phages and prophages from the Proteobacteria.**

Thin red lines separate individual phage and prophage genomes whose names are shown at the top and left; short and longer horizontal red lines separate bacterial host families (black text) and orders (red text), respectively, on the right. Thick blue lines separate Proteobacteria host classes (blue text on the right). Asterisks (\*) indicate prophages, and only representative authentic phage genomes are included. Phages and prophages in the plot are listed with host species, genome accession numbers, and MCP locus tags in Table S2. The dot plot was produced using Gepard (Krumnsiek, Arnold, and Rattei, 2007) at a word size setting of 9.

Figure S5

P2-like prophages with distantly related hosts

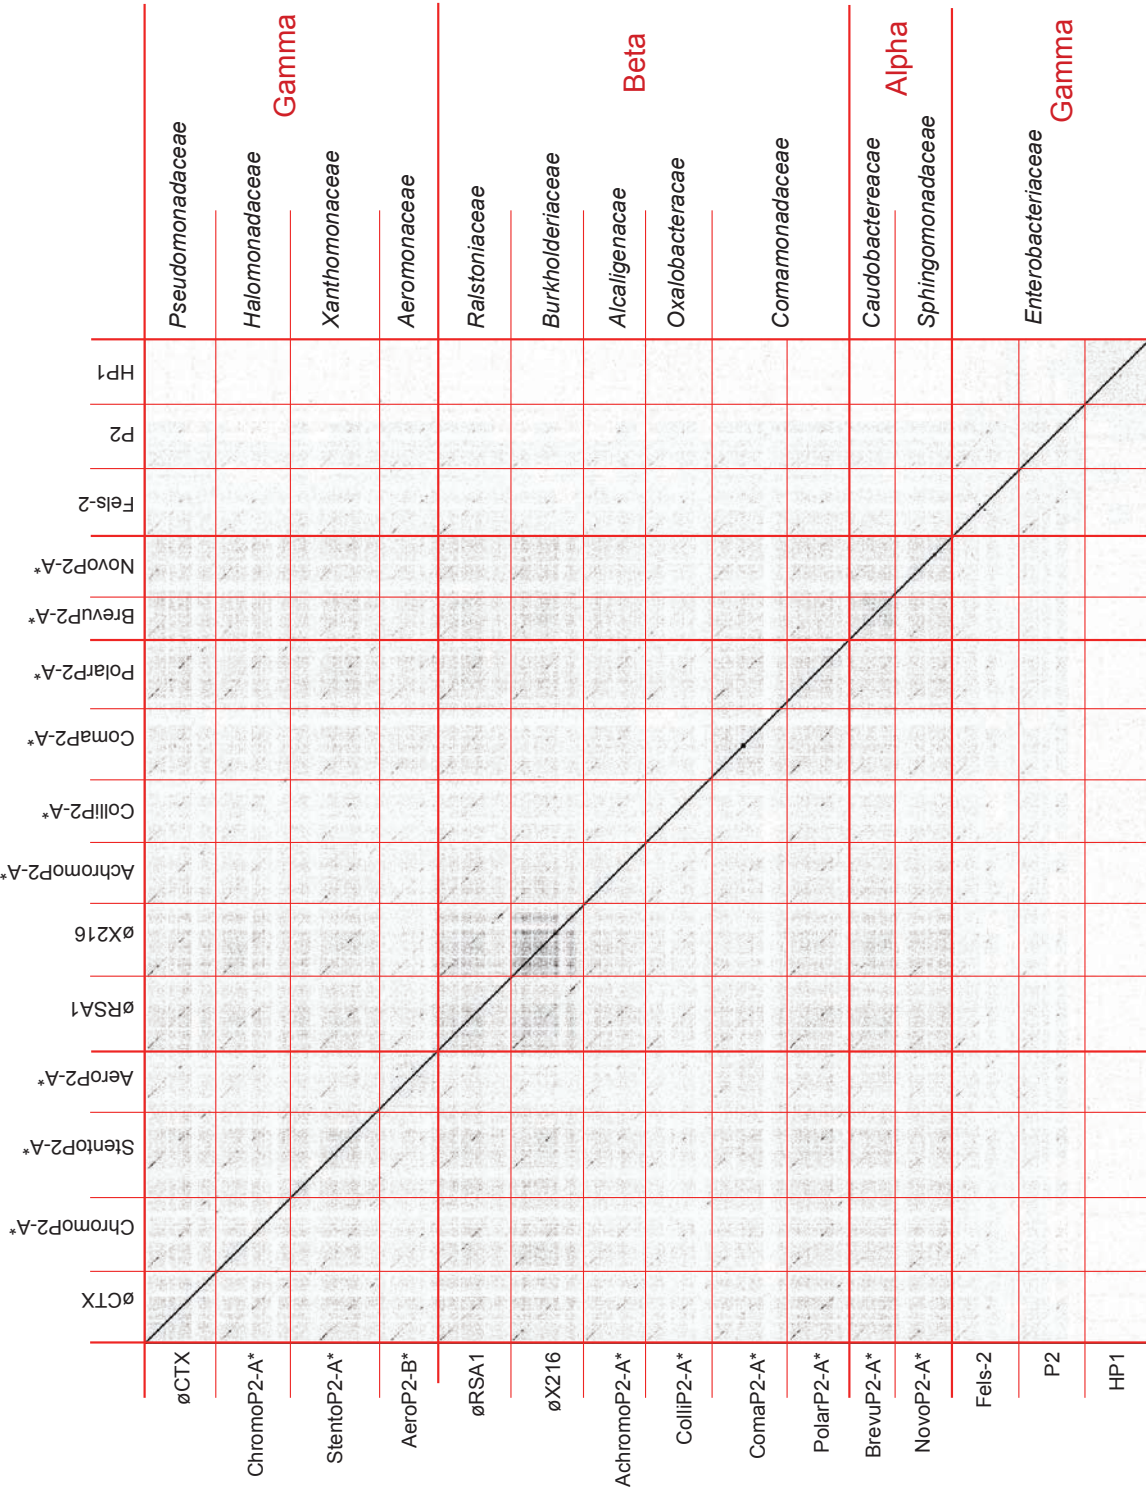

**Figure S5. Expanded genome dot plot of P2-like phages and prophages with distantly related hosts.**

Red lines separate phage and prophage genomes. Phage and prophage names are given on the left and top; asterisks (\*) indicate prophages, and only representative authentic phage genomes are included. Host families (black text) and Proteobacteria classes (red text) are shown at the right. Phages and prophages in the plot are listed with host species, genome accession numbers and MCP locus tags in Table S2. The dot plot was produced using Gepard (Krumstiek, Arnold, and Rattei, 2007) at a word size setting of 10.

Figure S6

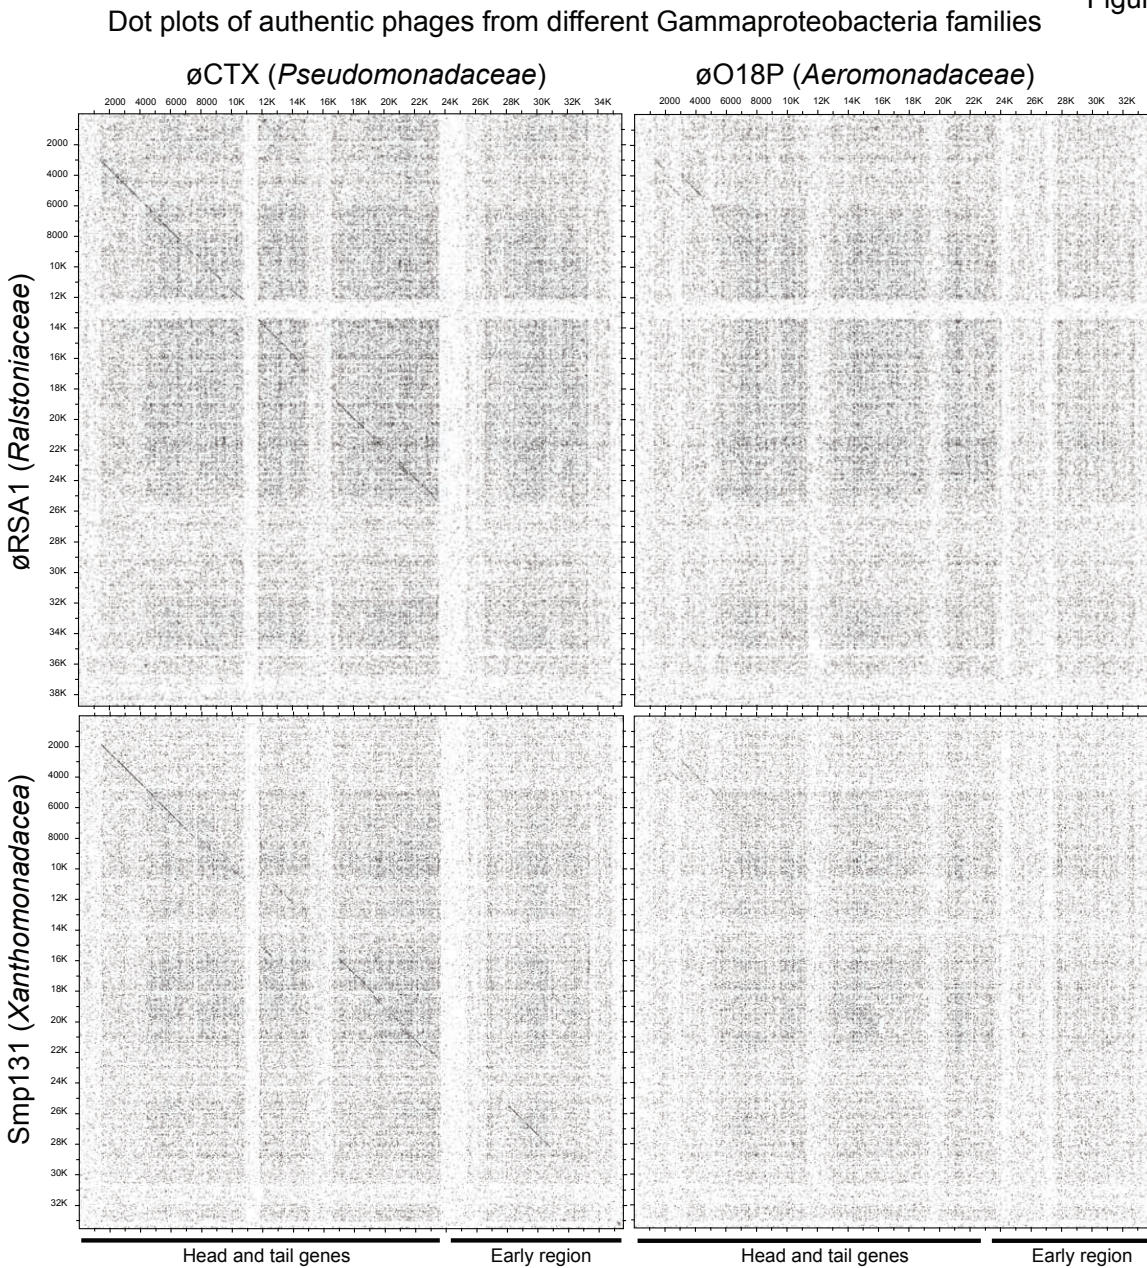

**Figure S6. Expanded genome dot plot analysis of authentic P2-like phage examples from different Gammaproteobacteria families.**

Phages indicated at the top and left of the plot are listed with host species and genome accession numbers in Table S2C. The dot plots were produced by DNA Strider (Douglas, 1994) with scan window 15 of 23 identities.

Figure S7

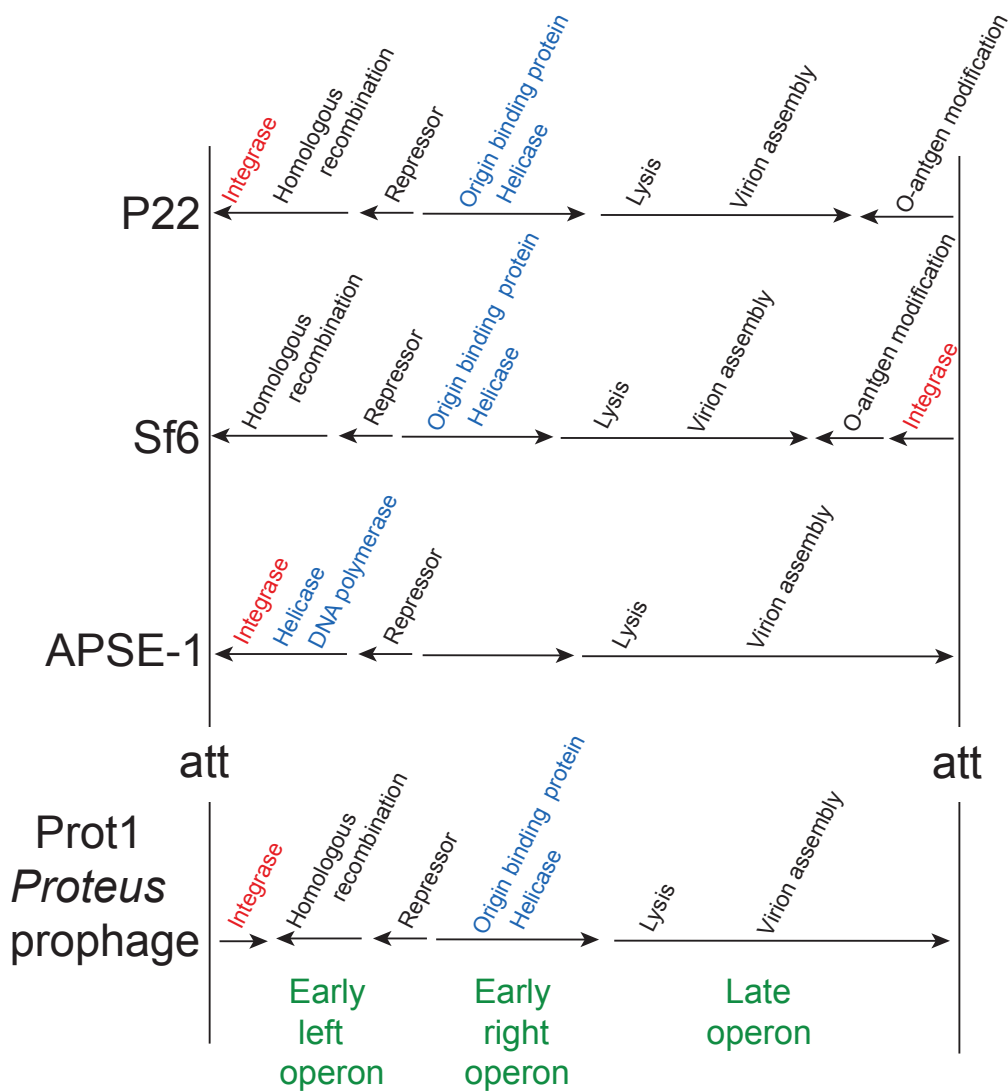

**Figure S7. Genome organizational types of the P22-like phages.**

Diagrammatic maps of the genomes of four different P22-like phages are shown. Arrows indicate transcriptional direction and the functions of genes in the various regions are shown above each map. The Prot1 prophage is in *Proteus mirabilis* strain ATCC7002 whose MCP locus\_tag is DR94\_520.

Figure S8

Examples of P22-like prophages

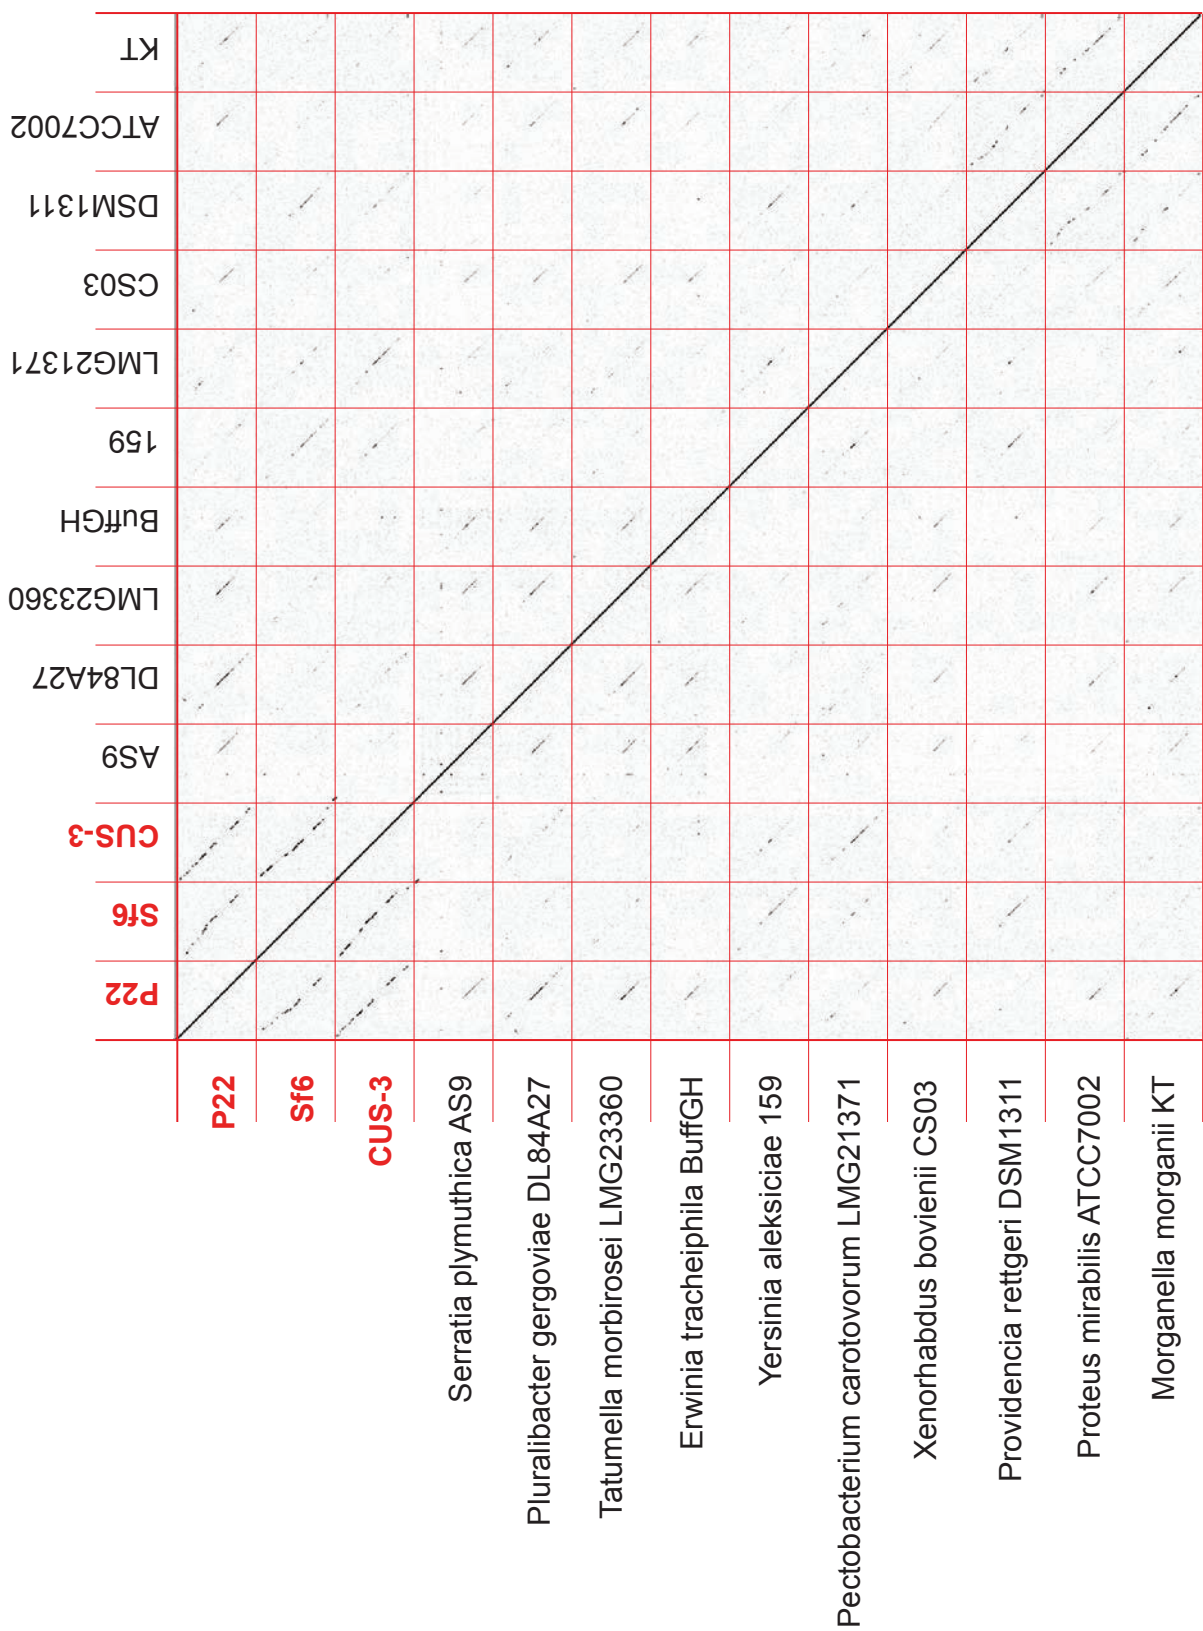

**Figure S8. Dot plot analysis of a sample of diverse *Enterobacteriaceae* P22-like prophage genomes.**

P22-like prophages in ten different *Enterobacteriaceae* species are shown with three authentic P22-like phages (bold red text) for comparison. The prophages are indicated by the host strain that they inhabit, and their MCP locus\_tags are listed in Table S4. The dot plot was produced using Gepard (Krumnsiek, Arnold, and Rattei, 2007) at a word size setting of 10.

P22-like MCP plot

Figure S9

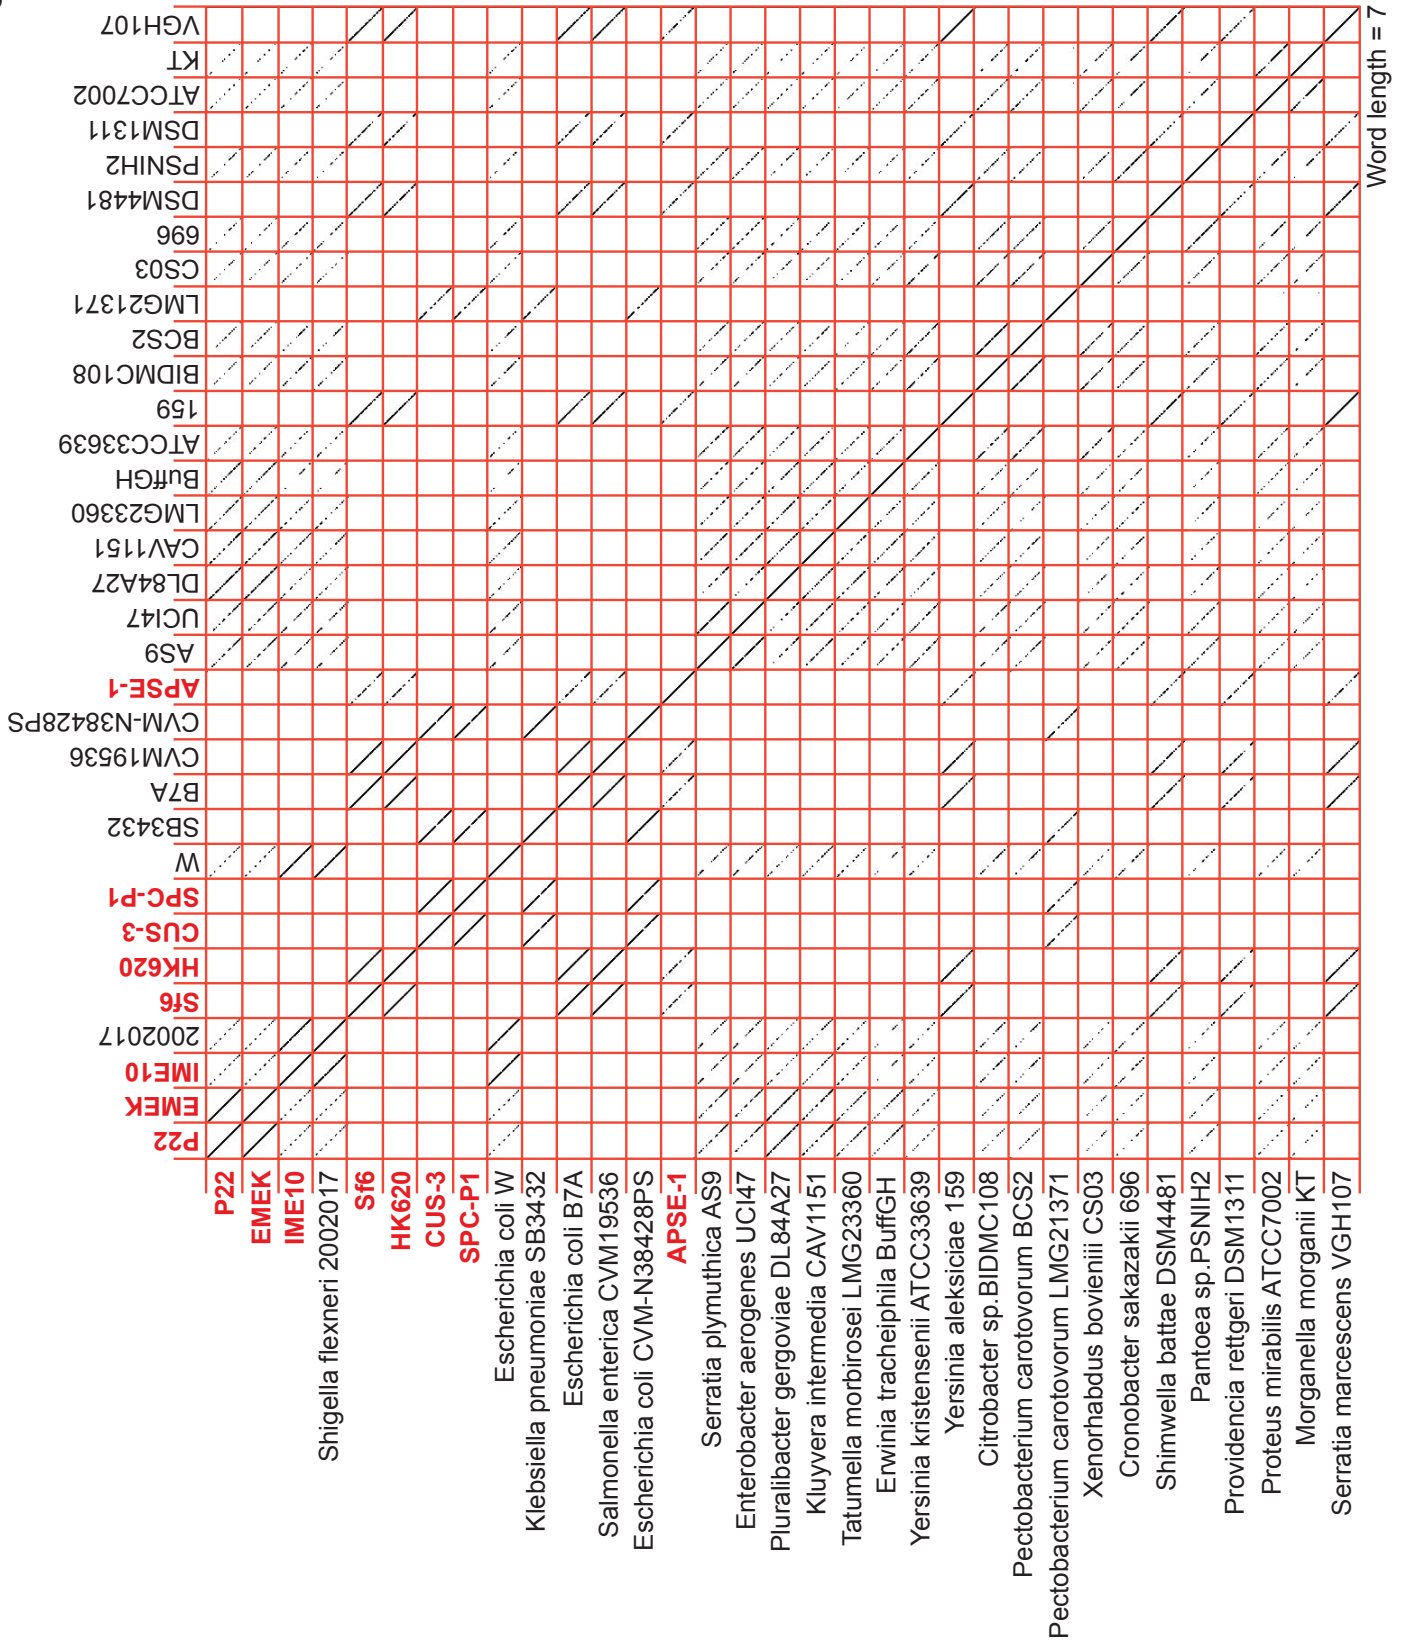



**Figure S9. Dot plot analysis of P22-like phage and prophage MCPs.**

Red lines separate phage and prophage MCPs. Authentic phage names are in bold red text, and prophage names are indicated by the host species and strain that carries them (listed in Table S4 with their MCP locus\_tags). The dot plot was produced by Gepard (Krumnsiek, Arnold, and Rattei, 2007) at a word size setting of 7.

Figure S10

*Salmonella* prophage genome dot plot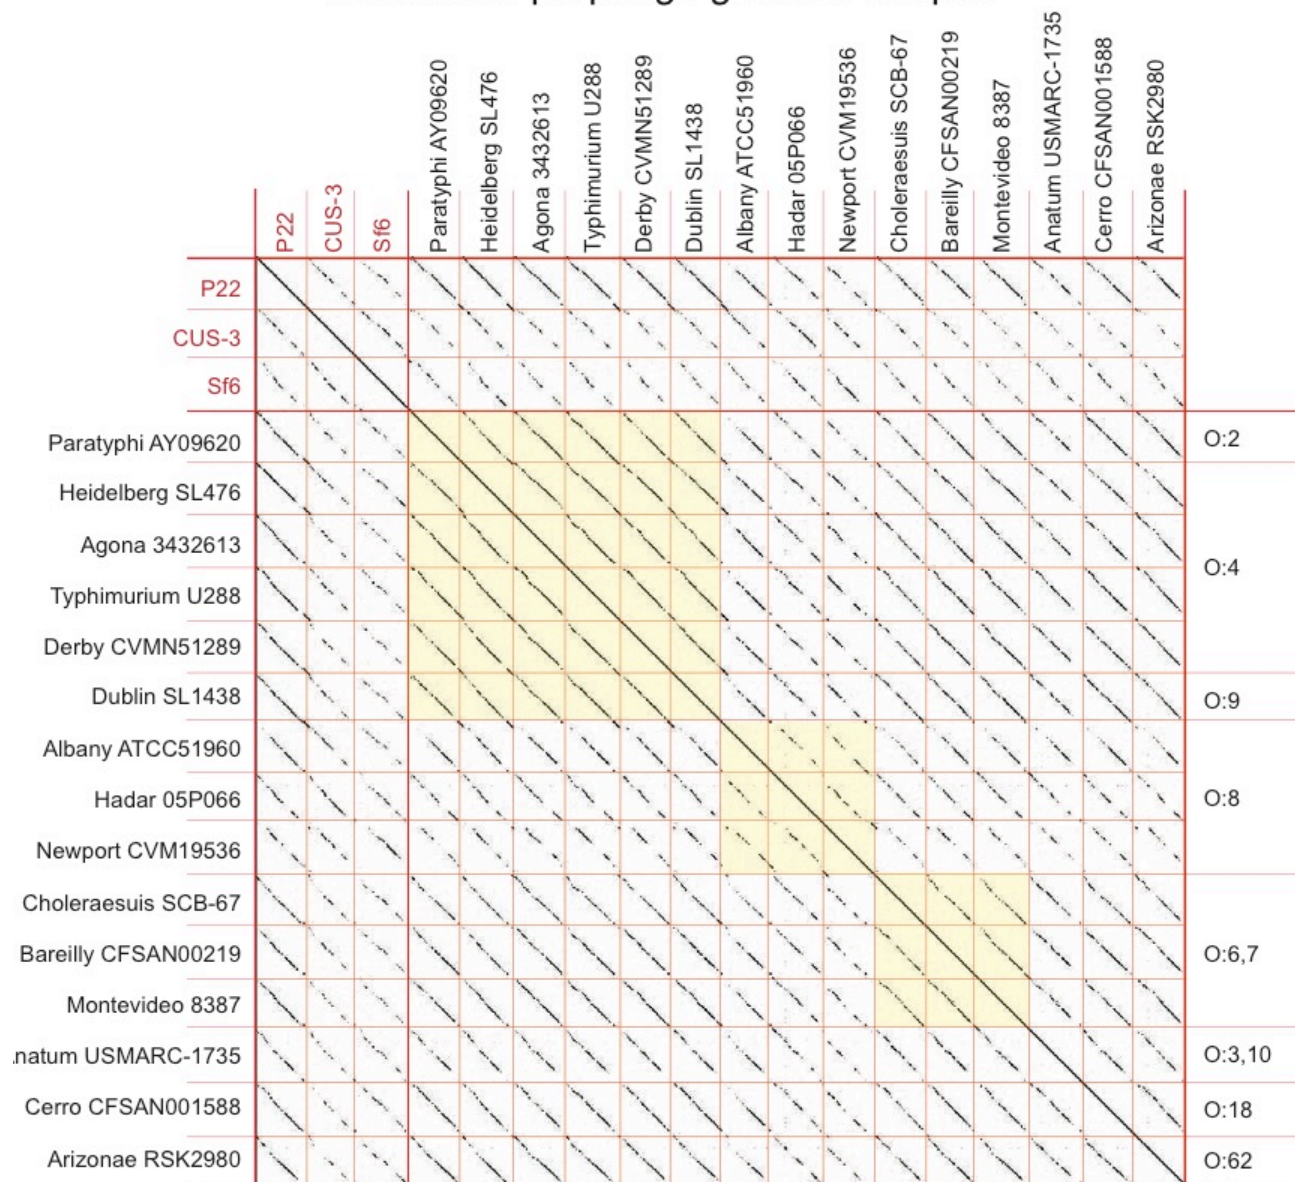**Figure S10. Dot plot analysis of P22-like prophage genomes in *Salmonella enterica*.**

P22-like prophages from fifteen different *Salmonella enterica* serovars are shown with three authentic P22-like phages (red text) shown for comparison. The yellow highlight boxes enclose groups of prophages in serovars with the same or closely related O-antigen structures (see text of report). The prophages are indicated by the host strain that they inhabit, and their MCP locus tags are listed in Table S4. The dot plot was produced using Gepard (Krumsiek, Arnold, and Rattei, 2007) at a word size setting of 11.

Figure S11

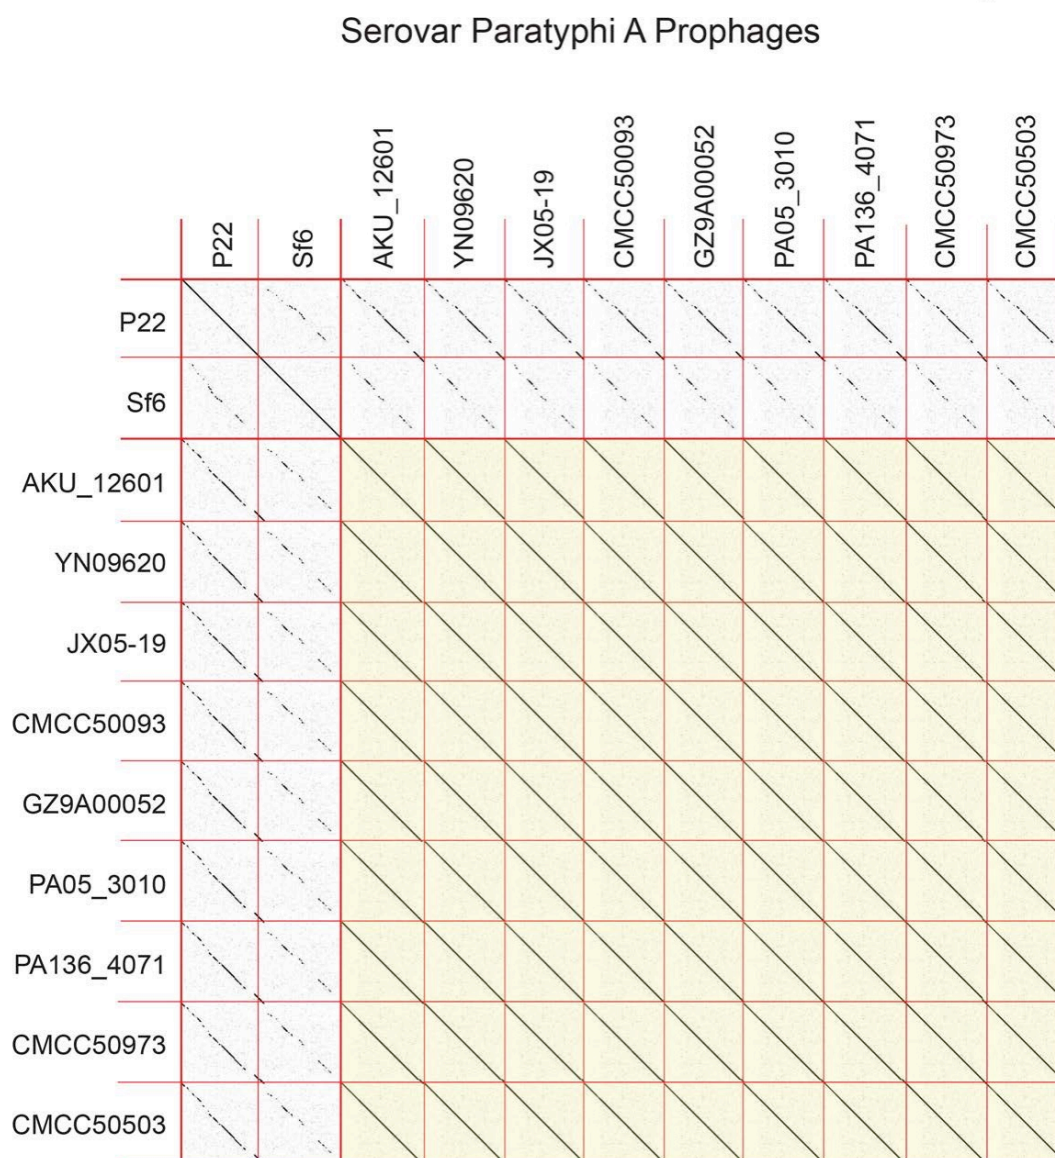

**Figure S11. Dot plot analysis of genomes of P22-like prophages in *Salmonella enterica* serovar Paratyphi A isolates.**

P22-like prophages from nine randomly chosen Paratyphi A isolates are shown with two authentic P22-like phages (P22 and Sf6) for comparison. The yellow highlight box encloses the nearly identical Paratyphi A prophages. The prophages are indicated by their host strain names (except two whose MCP locus\_tags are given since no strain name for the isolate is given in its GenBank entry), and phages and prophages in the plot are listed with host species and MCP locus tags in Table S4D. The dot plot was produced using Gepard (Krumstiek, Arnold, and Rattei, 2007) at a word size setting of 10.

Figure S12

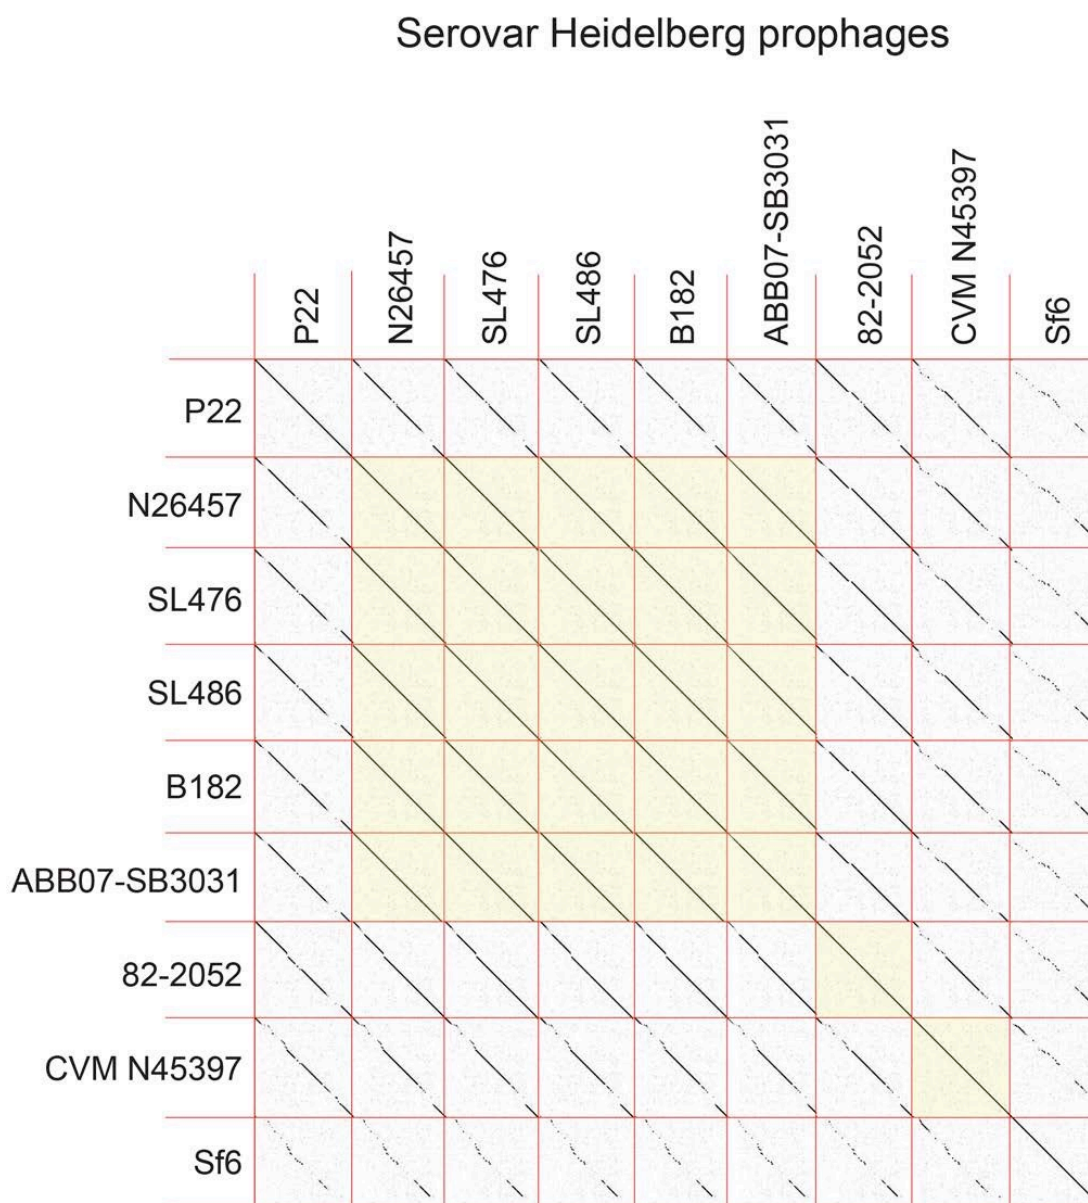

**Figure S12. Dot plot analysis of genomes of P22-like prophages in *Salmonella enterica* serovar Heidelberg isolates.**

P22-like prophages from seven Heidelberg isolates are shown with two authentic P22-like phages (P22 and Sf6) for comparison. The yellow highlight boxes indicate three different prophage types. The Heidelberg prophages are indicated by their host strain names. Prophages in the plot are listed with host species and MCP locus tags in Table S4E. The dot plot was produced using Gepard (Krumstiek, Arnold, and Rattei, 2007) at a word size setting of 10.

Figure S13

## Serovar Typhimurium Prophages

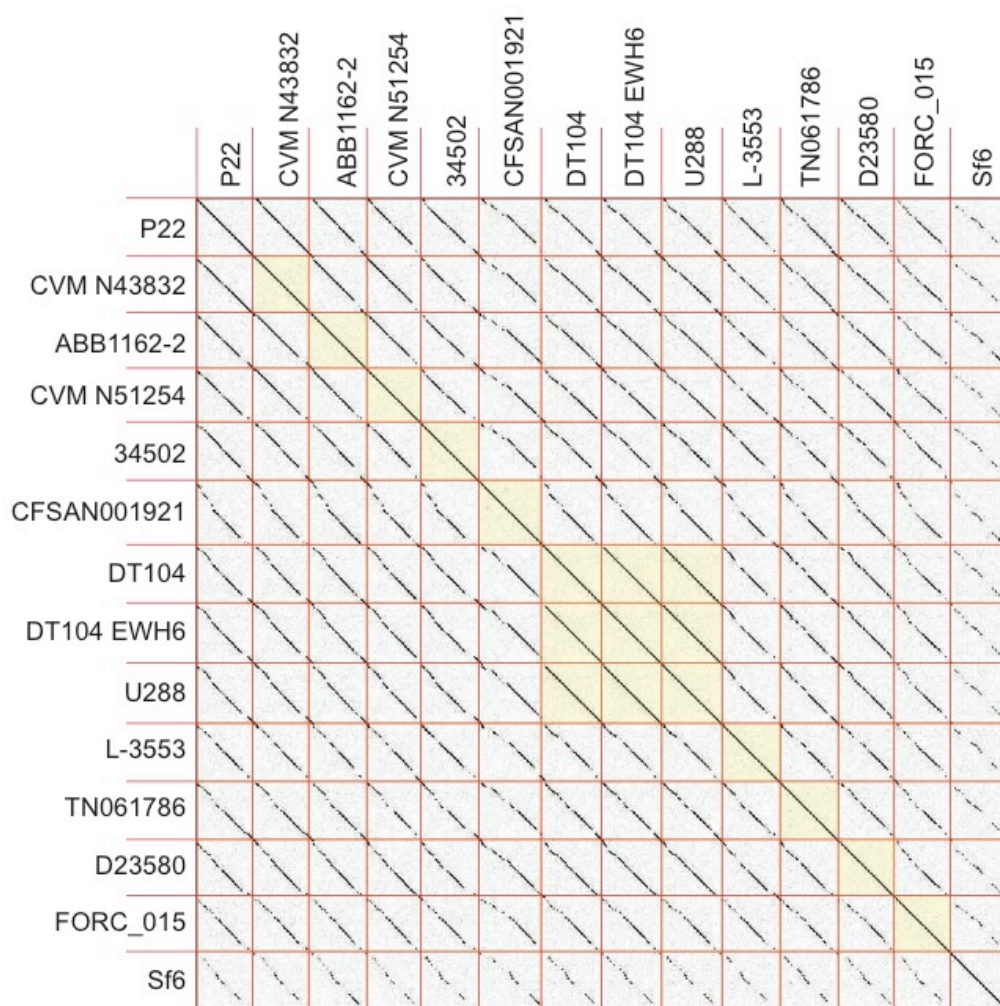

**Figure S13. Dot plot analysis of genomes of P22-like prophages in *Salmonella enterica* serovar Typhimurium isolates.**

P22-like prophages from twelve Typhimurium isolates are shown with two authentic P22-like phages (P22 and Sf6) for comparison. The Typhimurium sequences are indicated by their host strain names. The yellow highlight boxes indicate significantly different prophage types. Note that the serovar of strain FORC\_015 prophage was probably determined incorrectly; it is most likely an O:6,7 strain (see text of report). Phages and prophages in the plot are listed with host species and MCP locus tags in Table S4G. The dot plot was produced using Gepard (Krumstiek, Arnold, and Rattei, 2007) at a word size setting of 10.

## Serovar Newport Prophages

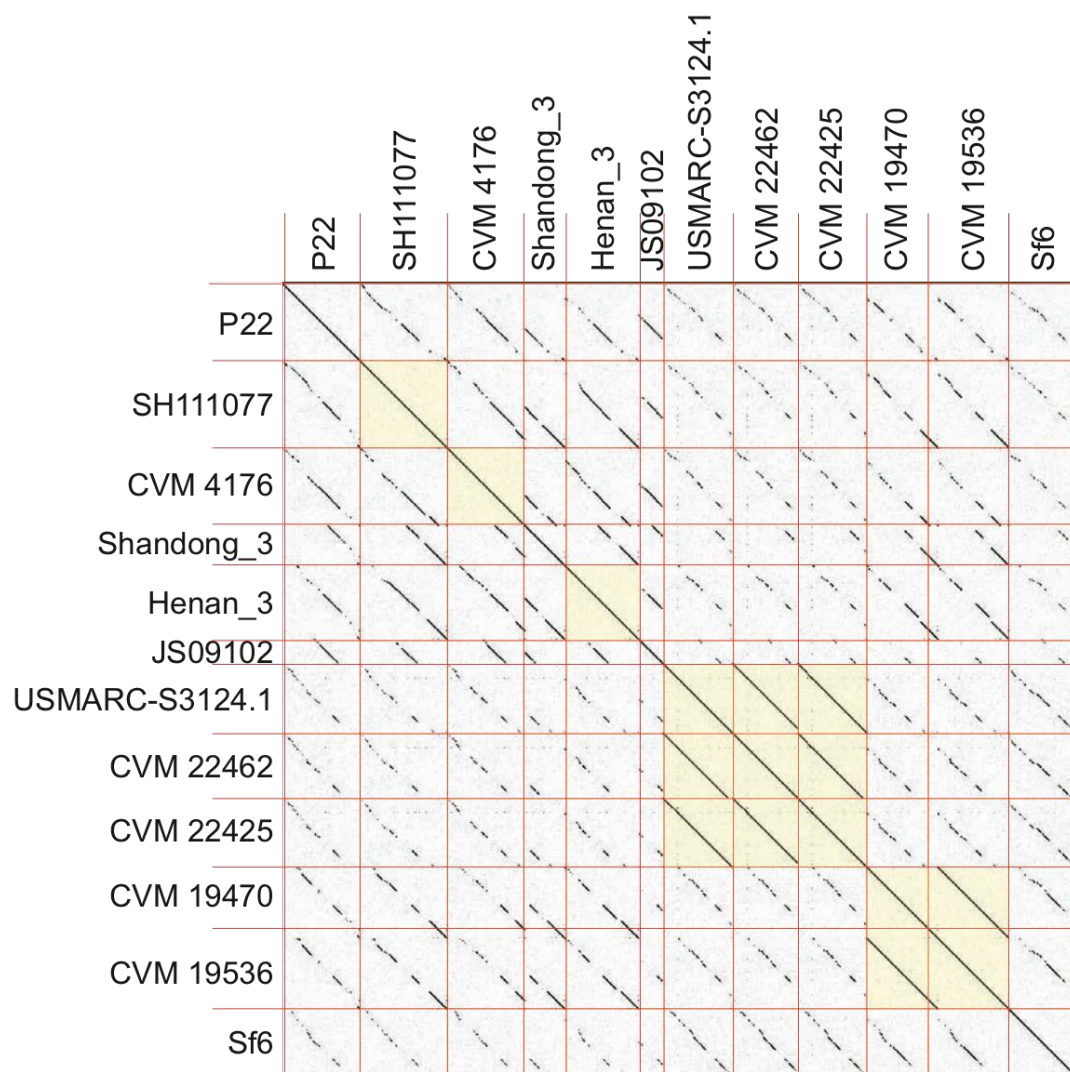

**Figure S14. Dot plot analysis of genomes of P22-like prophages in *Salmonella enterica* serovar Newport isolates.**

P22-like prophages from ten Newport isolates are shown with two authentic P22-like phages (P22 and Sf6) for comparison. The Newport sequences are indicated by their host strain names. The yellow highlight boxes indicate significantly different prophage types. Two of the ten Newport prophages, in strains Shandong\_3 and JS9102, are on short contigs that were not included in the subsequent analysis (see text). Prophages in the plot are listed with host species and MCP locus tags in Table S4F. The dot plot was produced using Gepard (Krumsiek, Arnold, and Rattei, 2007) at a word size setting of 10.

Figure S15

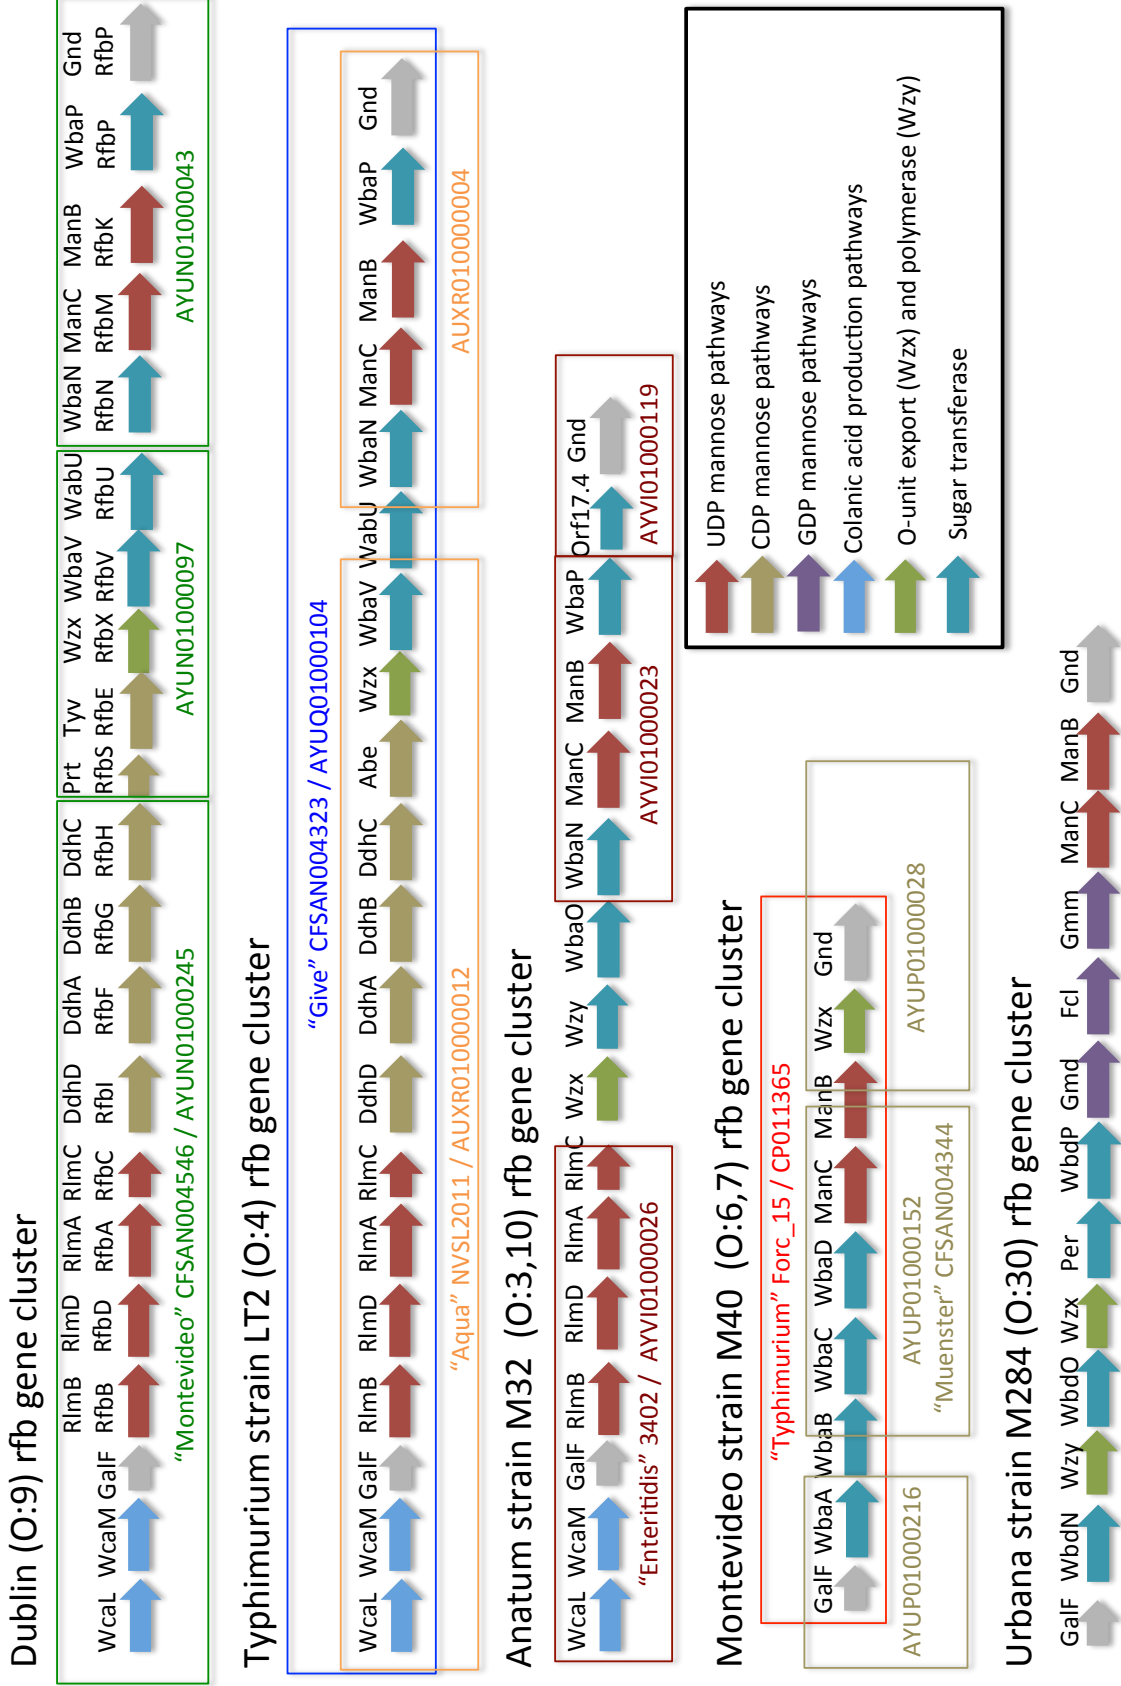

**Figure S15. O-antigen synthesis (*rfb* gene) regions of the genomes of the *Salmonella* strains that carry "anomalous" tailspike genes.**

Colored arrows represent genes in selected *rfb* regions from the genomes of the indicated *S. enterica* reference strains whose names are given above in large black text; gene names are shown above each map. Colored boxes and similarly colored text indicate the strains and sequence contig accession numbers of the six genomes with "anomalous" tailspike gene discussed in the text of this report. The gene order and content of each of these strains uniquely matches one of the reference regions. The reference *S. enterica rfb* gene regions shown are from the following sources: O:9 serovar Dublin, bp 2019907–1996618 of accession No. LK931502; O:4 serovar Typhimurium strain LT2, X56793 (Wyk and Reeves, 1989; Jiang et al., 1991; Liu et al., 1993; Reeves, 1993); O:3,10 serovar Anatum strain M32, X60665 (Liu et al., 1993) and ATCC BAA-1592, CP007531 (Timme et al., 2013); O:6,7 serovar Montevideo, M84642 (Reeves, 1993); and O:30 serovar Urbana strain M284, AY730593 (Jensen and Reeves, 2001; Samuel et al., 2004).



Figure S16

# Novel mosaic boundary inside the tailspike gene

Red = serovar Choleraesuis str. SC-B67 locus\_tag="SCH\_0367"  
 Blue = serovar Ohio str. CFSAN001079 locus\_tag="CFSAN001079\_21649"

## N-terminal head-binding domain

```

1  MSDITANVVVSNRPPIFTESRSFKAVADGKIIYCKIDIDTPVNPANQIPVYIENEDGSHVOIAQPLIINSAGKIYVINGOLVKIVTVOGHSMAIYDAYGSOVDYIANVLKYDDPQFRQELAEFDGSK 125
M+DITANVVVSNRPPIFTESRSFKAVA+GKIYICKIDIDTPVNPANQIPVYIENEDGSHVOIAQPLIINSAGKIYVINGOLVKIVTVOGHSMAIYDAYGSOVDYIANVLKYDDPQFRQELAEFDGSK
1  MTDITANVVVSNRPPIFTESRSFKAVANGKIIYCKIDIDTPVNPANQIPVYIENEDGSHVQIAQPLIINSAGKIYVINGOLVKIVTVOGHSMAIYDAYGSOVDYIANVLKYDDPQFRQELAEFDGSK 125
    
```

## New intra-tailspike mosaic boundary

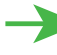

```

126  KVGKDSNYVDP-----LNKLELKFKSFOEMRDDNSNEIGDYALLTGWHTHEHOGYAGVFCVQVDKGLTDDGGTIAVGSYAMKRITGPDATFEGVVENAGSAFDNKAVILAAAATGALIFP 243
KVGKDSNYVDT L KLELKFKSFQ MRDD+SNEIGDYALLTGMH E+QG+GAGVFCVQVDKGLTDDGGTIAVGSYAMKRITGPDATFEGVVENAGSAFDNK YI +A + I P
126  KVGKDSNYVDTLARHDNELAKLELKFKSFOAMRDDNSNEIGDYALLTGMHEEYQGHGAGVFCVQVDKGLTDDGGTIAVGSYAMKRITGPDATFEGVVENAGSAFDNKQYIESAESVKKCILP 250
    140 160 180 200 220 240
244  AGDIYTKFFTLDTYIVRGNSNMLYEINDSEATDFIVHCSRNQEQMDGRIDGHSWEGVNVVYVDPGHRPHFTYFTTNGNMRDCRF-HGGIGSWFDGYSNMFIDSCFEFSGS-----LGGENLINTPKVD 363
A + Y+ L + I + T + WD RI + + VIF+ G H+ FT ++ + G + +GV NW + C F G+ E N P V+
251  AAEXYSTKIILVNGCISGNGGI AVLRLQMSDDVTGGNYIEISAQNWDSRIKNGVIXDLAVYPLSGTVAIHSSFTQYFDIVNVTTISGGYNGMFLGEGVGNMNLARGCTFYGAKNNGCRIETRYNDP=VN 374
    260 280 300 320 340 360
364  PQQIGTWVVIHFKC-FISRSAGVYARTIGLPSVMFRDCIVVYNRD SGLLHYDEDAYPNVEFGVQVTCGCD IDSNDSGVMIRDVYVPI SNHWVSSGR--VLMQPGVVLIRCRDINNVVENSVYF 485
IGT++ F +C F SAG G + PSV+F C +XN GL + + F V + CD DSN S + V D+++NW+ R V+L C D + N +
375  LLMEIGTFFSQACAFRDT SAGPGCVVHPFSVFFEQCTFFFNATVGLYCNSN=-NIMLNFVYVNASNCDFDLSGSIHCLAVLWLDLHNHWIIGGPRDSDGLSDSLLLEDQMDFKITGNEIVE 497
    380 400 420 440 460 480
486  NGTHGISVEVCNFGTISNNNCNDNKNRGISTIQSDAGTSSKLTVSGNVCCTGFLPSLPTAQOEEGHIIEGERIVSYCNVCTGNASSQYVNSASNKQEGMNIIS 586
+G+S+ CN G+I+ N + NKN G+ + S I++ GN T A G HI + N T NA V I S
498  GTDNGLSLYRCNRGSIITGNVLSGNKNSGLFLDSCN SIAATGNLTGNLDW=TRFRQKTGAMLNGEHIVFTGNSLWKN=-TDNAINNVYVDPQVYNSVINS 595
    500 520 540 560 580 595
    
```

**Figure S16. New mosaic boundary in the P22-like tailspike gene.**

The newly discovered mosaic P22-like phage boundary in the tailspike gene is shown by comparing the amino acid sequences of type Va (*S. enterica* serovar Choleraesuis strain SC-B67) and type Vc (*S. enterica* serovar Ohio strain CFSAN001079) tailspikes as aligned by DNA Strider (Douglas, 1994). The N-terminal head-binding domain is indicated by the yellow box, the green box marks the N-terminal common region of the type V tailspike polysaccharide-binding domain, and the green vertical arrow marks the position of the newly discovered mosaic boundary.

**References**

- Casjens, S., Winn-Stapley, D., Gilcrease, E., Moreno, R., Kühlewein, C., Chua, J. E., Manning, P. A., Inwood, W., and Clark, A. J. (2004). The chromosome of *Shigella flexneri* bacteriophage Sf6: complete nucleotide sequence, genetic mosaicism, and DNA packaging. *J. Mol. Biol.* **339**, 379-394.
- Cumby, N., Davidson, A. R., and Maxwell, K. L. (2012). The moron comes of age. *Bacteriophage* **2**, 225-228.
- Douglas, S. E. (1994). DNA Strider. A Macintosh program for handling protein and nucleic acid sequences. *Methods Mol. Biol.* **25**, 181-194.
- Hendrix, R. W., Lawrence, J. G., Hatfull, G. F., and Casjens, S. (2000). The origins and ongoing evolution of viruses. *Trends Microbiol.* **8**, 504-508.
- Hua, Y., An, X., Pei, G., Li, S., Wang, W., Xu, X., Fan, H., Huang, Y., Zhang, Z., Mi, Z., Chen, J., Li, J., Zhang, F., and Tong, Y. (2014). Characterization of the morphology and genome of an *Escherichia coli* podovirus. *Arch. Virol.* **159**, 3249-3256.
- Jensen, S. O., and Reeves, P. R. (2001). Molecular evolution of the GDP-mannose pathway genes (*manB* and *manC*) in *Salmonella enterica*. *Microbiology* **147** (Pt 3), 599-610.
- Jiang, X. M., Neal, B., Santiago, F., Lee, S. J., Romana, L. K., and Reeves, P. R. (1991). Structure and sequence of the *rfb* (O antigen) gene cluster of *Salmonella* serovar typhimurium (strain LT2). *Molec. Microbiol.* **5**, 695-713.
- Juhala, R. J., Ford, M. E., Duda, R. L., Youlton, A., Hatfull, G. F., and Hendrix, R. W. (2000). Genomic sequences of bacteriophages HK97 and HK022: pervasive genetic mosaicism in the lambdoid bacteriophages. *J. Mol. Biol.* **299**, 27-51.
- King, M. R., Vimr, R. P., Steenbergen, S. M., Spanjaard, L., Plunkett, G., 3rd, Blattner, F. R., and Vimr, E. R. (2007). *Escherichia coli* K1-specific bacteriophage CUS-3 distribution and function in phase-variable capsular polysialic acid O acetylation. *J. Bacteriol.* **189**, 6447-6456.
- Krumsiek, J., Arnold, R., and Rattei, T. (2007). Gepard: a rapid and sensitive tool for creating dotplots on genome scale. *Bioinformatics* **23**, 1026-1028.
- Liu, D., Haase, A. M., Lindqvist, L., Lindberg, A. A., and Reeves, P. R. (1993). Glycosyl transferases of O-antigen biosynthesis in *Salmonella enterica*:

- identification and characterization of transferase genes of groups B, C2, and E1. *J. Bacteriol.* **175**, 3408-3413.
- Malki, K., Kula, A., Bruder, K., Sible, E., Hatzopoulos, T., Steidel, S., Watkins, S., and Putonti, C. (2015). Bacteriophages isolated from Lake Michigan demonstrate broad host-range across several bacterial phyla. *Viol. J.* **12**, 164.
- Olia, A. S., Casjens, S., and Cingolani, G. (2007). Structure of phage P22 cell envelope-penetrating needle. *Nat. Struct. Mol. Biol.* **14**, 1221-1226.
- Reeves, P. (1993). Evolution of *Salmonella* O antigen variation by interspecific gene transfer on a large scale. *Trends Genet.* **9**, 17-22.
- Samuel, G., Hogbin, J. P., Wang, L., and Reeves, P. R. (2004). Relationships of the *Escherichia coli* O157, O111, and O55 O-antigen gene clusters with those of *Salmonella enterica* and *Citrobacter freundii*, which express identical O antigens. *J. Bacteriol.* **186**, 6536-6543.
- Timme, R. E., Pettengill, J. B., Allard, M. W., Strain, E., Barrangou, R., Wehnes, C., Van Kessel, J. S., Karns, J. S., Musser, S. M., and Brown, E. W. (2013). Phylogenetic diversity of the enteric pathogen *Salmonella enterica* subsp. *enterica* inferred from genome-wide reference-free SNP characters. *Genome Biol. Evol.* **5**, 2109-2123.
- Wyk, P., and Reeves, P. (1989). Identification and sequence of the gene for abequose synthase, which confers antigenic specificity on group B salmonellae: homology with galactose epimerase. *J. Bacteriol.* **171**, 5687-5693.
